# Supplementary material for: Linear and Nonlinear Optical Properties of Quadrupolar Bithiophenes and Cyclopentadithiophenes as Fluorescent Oxygen Photosensitizers
Source: MDPI journal article supplement (doi:10.3390/photochem3010009), 2023-02-20
Supplement: s1 [file s1]

## Supporting Information (SI)

### Linear and Nonlinear Optical Properties of Quadrupolar Bithiophenes and Cyclopentadithiophenes as Fluorescent Oxygen Photosensitizers

Nicolas Richy,<sup>a</sup> Safa Gam,<sup>a,b,c</sup> Sabri Messaoudi,<sup>b,c,d</sup> Amédée Triadon,<sup>a,e</sup> Olivier Mongin,<sup>a</sup> Mireille Blanchard-Desce,<sup>f</sup> Camille Latouche,<sup>g</sup> Mark G. Humphrey,<sup>e</sup> Abdou Boucekkine,<sup>a,\*</sup> Jean-François Halet,<sup>h,\*</sup> and Frédéric Paul<sup>a,\*</sup>

<sup>a</sup>*Univ Rennes, CNRS, Institut des Sciences Chimiques de Rennes (ISCR) – UMR 6226, F-35000 Rennes, France. E-mail: frederic.paul@univ-rennes1.fr, Abdou.Boucekkine@univ-rennes1.fr*

<sup>b</sup>*Faculty of Sciences of Bizerte FSB, University of Carthage, 7021 Jarzouna, Tunisia*

<sup>c</sup>*Laboratory of Materials, Molecules and Applications, IPEST, University of Carthage, SidiBou Said Road, B.P. 51, 2070 La Marsa, Tunisia*

<sup>d</sup>*Department of Chemistry, College of Science, Qassim University, Buraidah 51452, Saudi Arabia*

<sup>e</sup>*Research School of Chemistry, Australian National University, Canberra, ACT 2601, Australia*

<sup>f</sup>*Univ. Bordeaux, CNRS, Bordeaux INP, ISM (UMR5255), Bat A12, 351 Cours de la Libération, F-33405 Talence CEDEX, France*

<sup>g</sup>*Nantes Université, CNRS, IMN (Institut des Matériaux de Nantes Jean Rouxel), F-44000 Nantes, France*

<sup>h</sup>*CNRS – Saint-Gobain – NIMS, IRL 3629, Laboratory for Innovative Key Materials and Structures (LINK), National Institute for Materials Science (NIMS), Tsukuba, 305-0044, Japan. E-mail: Jean-Francois.Halet@univ-rennes1.fr*

### Contents:

- 1- **Figures S1-7.**  $^1\text{H}$  /  $^{13}\text{C}\{^1\text{H}\}$  /  $^{19}\text{F}\{^1\text{H}\}$  NMR spectra for the new compounds **1a,b**, **2a,b** and **9** P. S3.
- 2- **Figures S8-9.** Two-photon excited fluorescence (2PEF) data for **1a,b** and **2a,b** P. S10.
- 3- **Tables S1-2, Figures S10-14 and Scheme S1.** Conformers and conformational freedom at the PBE0/6-31+G(d) level of theory for **1a,b** and **2a,b** P. S12.
- 4- **Tables S3-6.** TD-DFT calculations for **1a,b** and **2a,b** P. S19.
- 5- **Figure S15.** Vibronic calculations for emissions of **1a,b** and **2a,b** P. S21.
- 6- **Figure S16.** Calculated spin density in the first triplet ( $T_1$ ) excited state of **1a,b** and **2a,b** P. S23.

- 7- **Figure S17 and Tables S7-S14.** Calculated one-photon and two-photon absorption for **1a,b** and **2a,b** using SOAP functionals P. S24.
- 8- **Tables S15-17.** Optimized Cartesian coordinates for **1a,b** and **2a,b** using PBE1PBE/6-31+G(d) in toluene P. S27.

1.  $^1\text{H}$  /  $^{13}\text{C}\{^1\text{H}\}$  /  $^{19}\text{F}\{^1\text{H}\}$  NMR spectra for the new compounds **1a**, **2a**, **b** and **9**

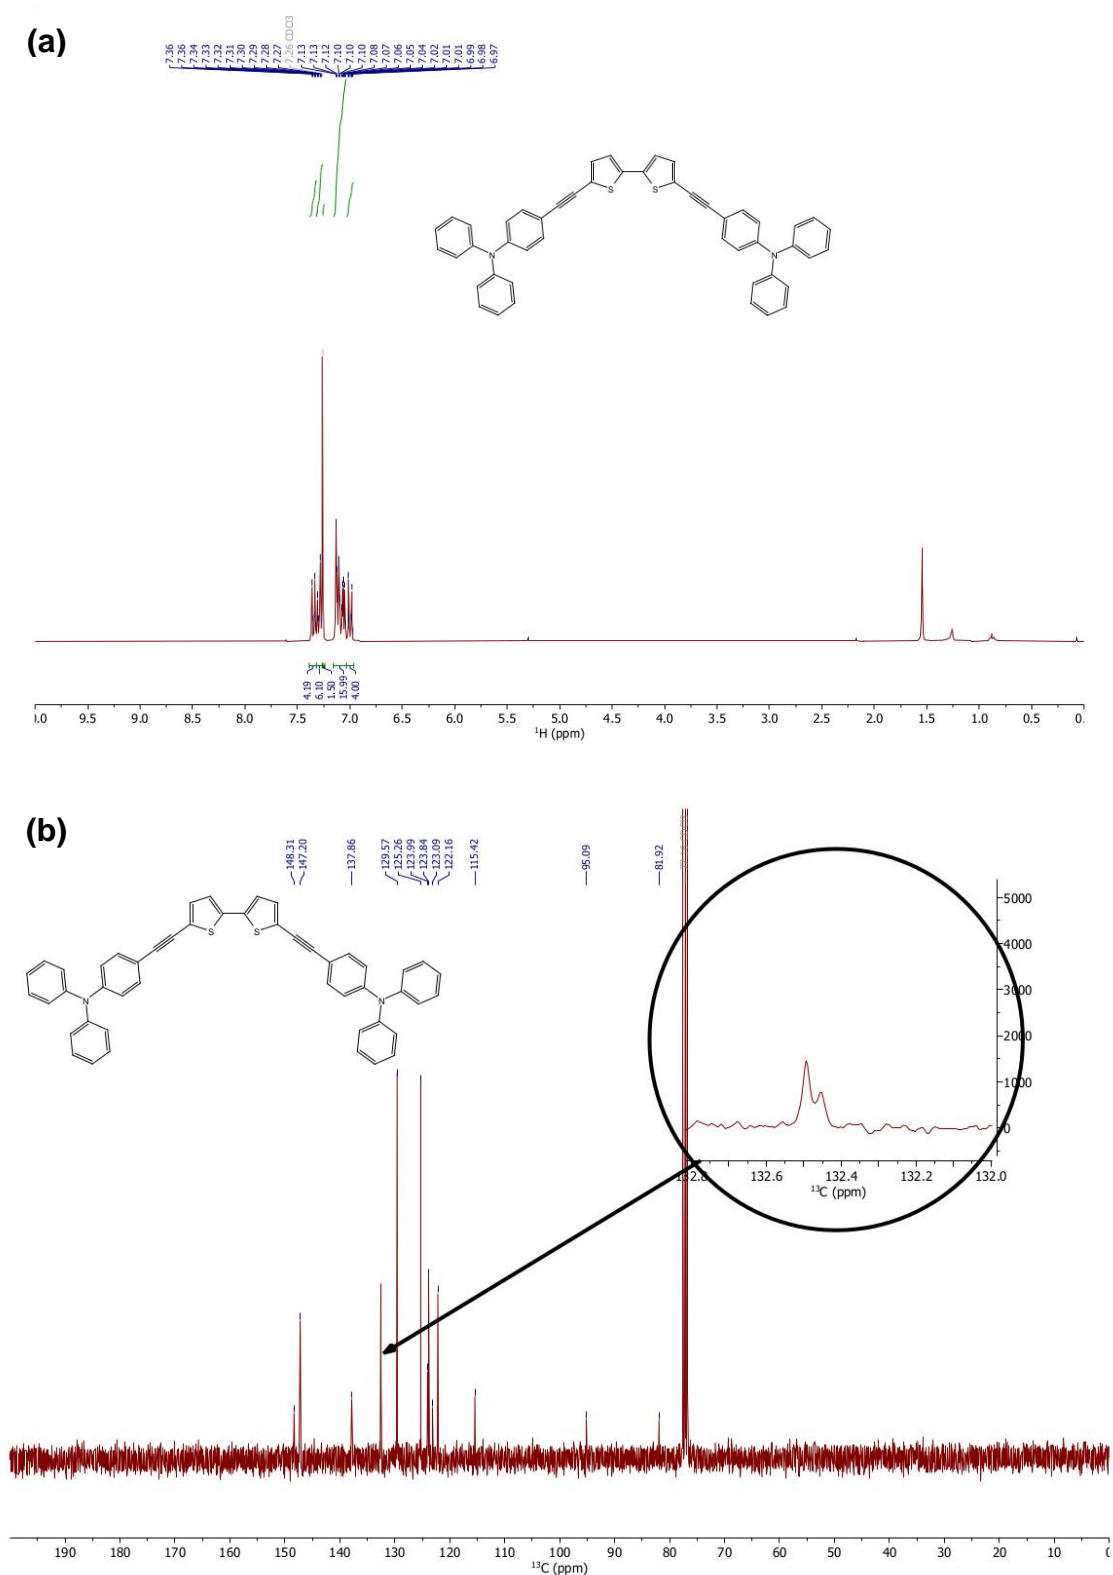

**Figure S1.**  $^1\text{H}$  (a) and  $^{13}\text{C}\{^1\text{H}\}$  (b) NMR spectra at 300 and 75 MHz, respectively, for **1a** in  $\text{CDCl}_3$ .

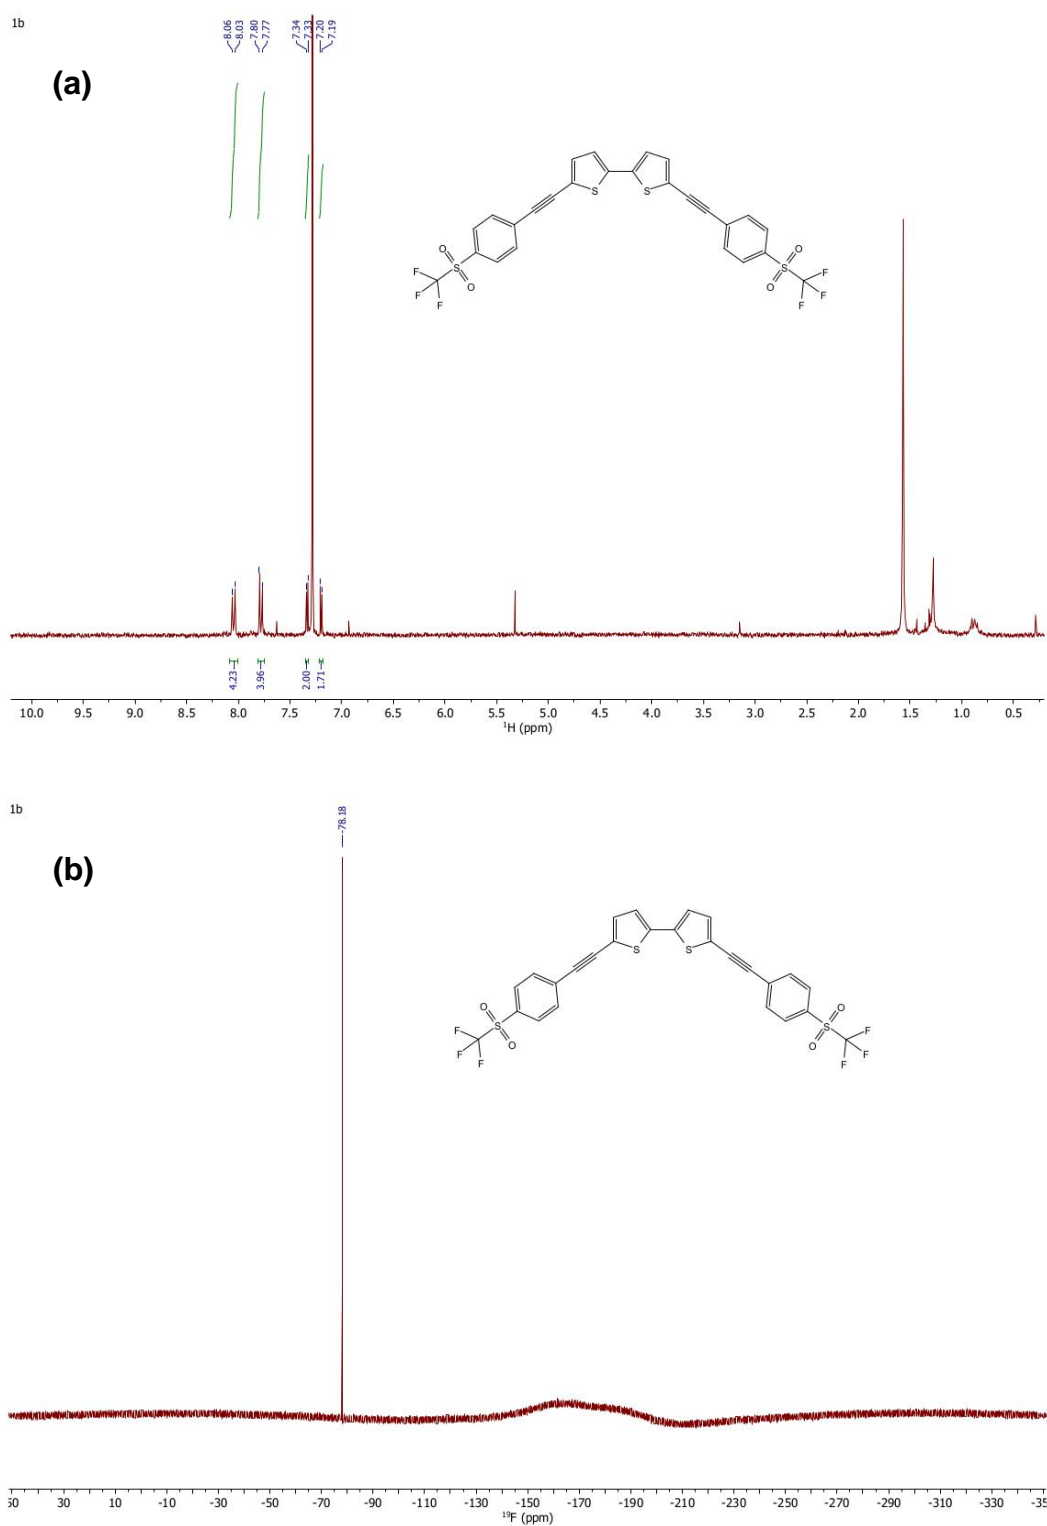

**Figure S2.**  $^1\text{H}$  (a) and  $^{19}\text{F}\{^1\text{H}\}$  (b) NMR spectra at 300 and 282 MHz, respectively, for **1b** in  $\text{CDCl}_3$ .

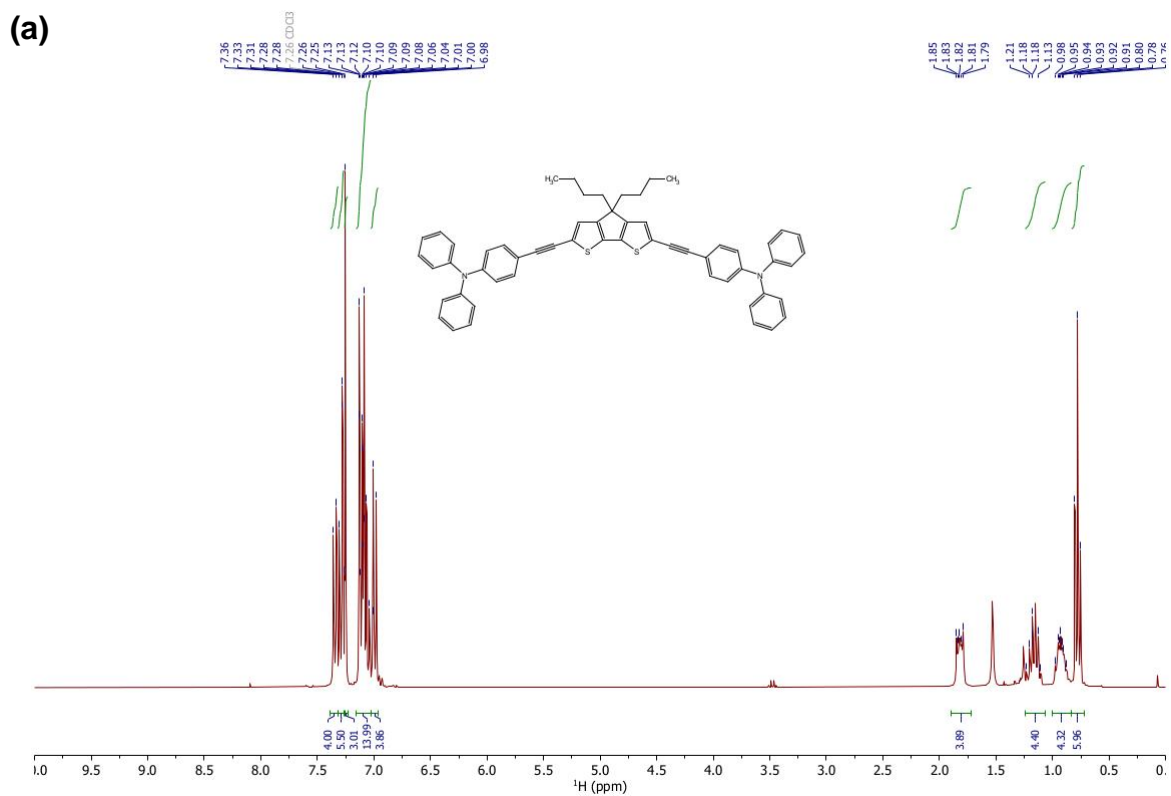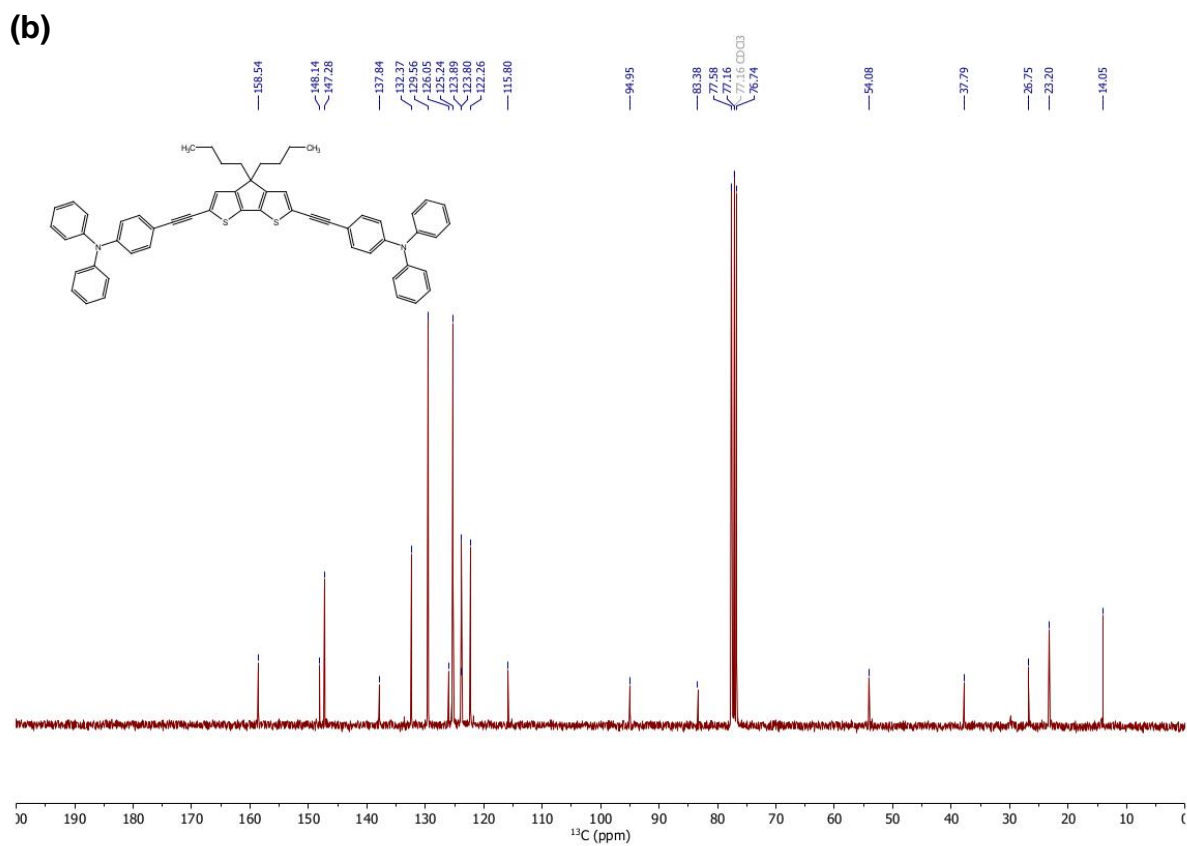

**Figure S3.**  $^1\text{H}$  (a) and  $^{13}\text{C}\{^1\text{H}\}$  (b) NMR spectra at 300 and 75 MHz, respectively, for **2a** in  $\text{CDCl}_3$ .

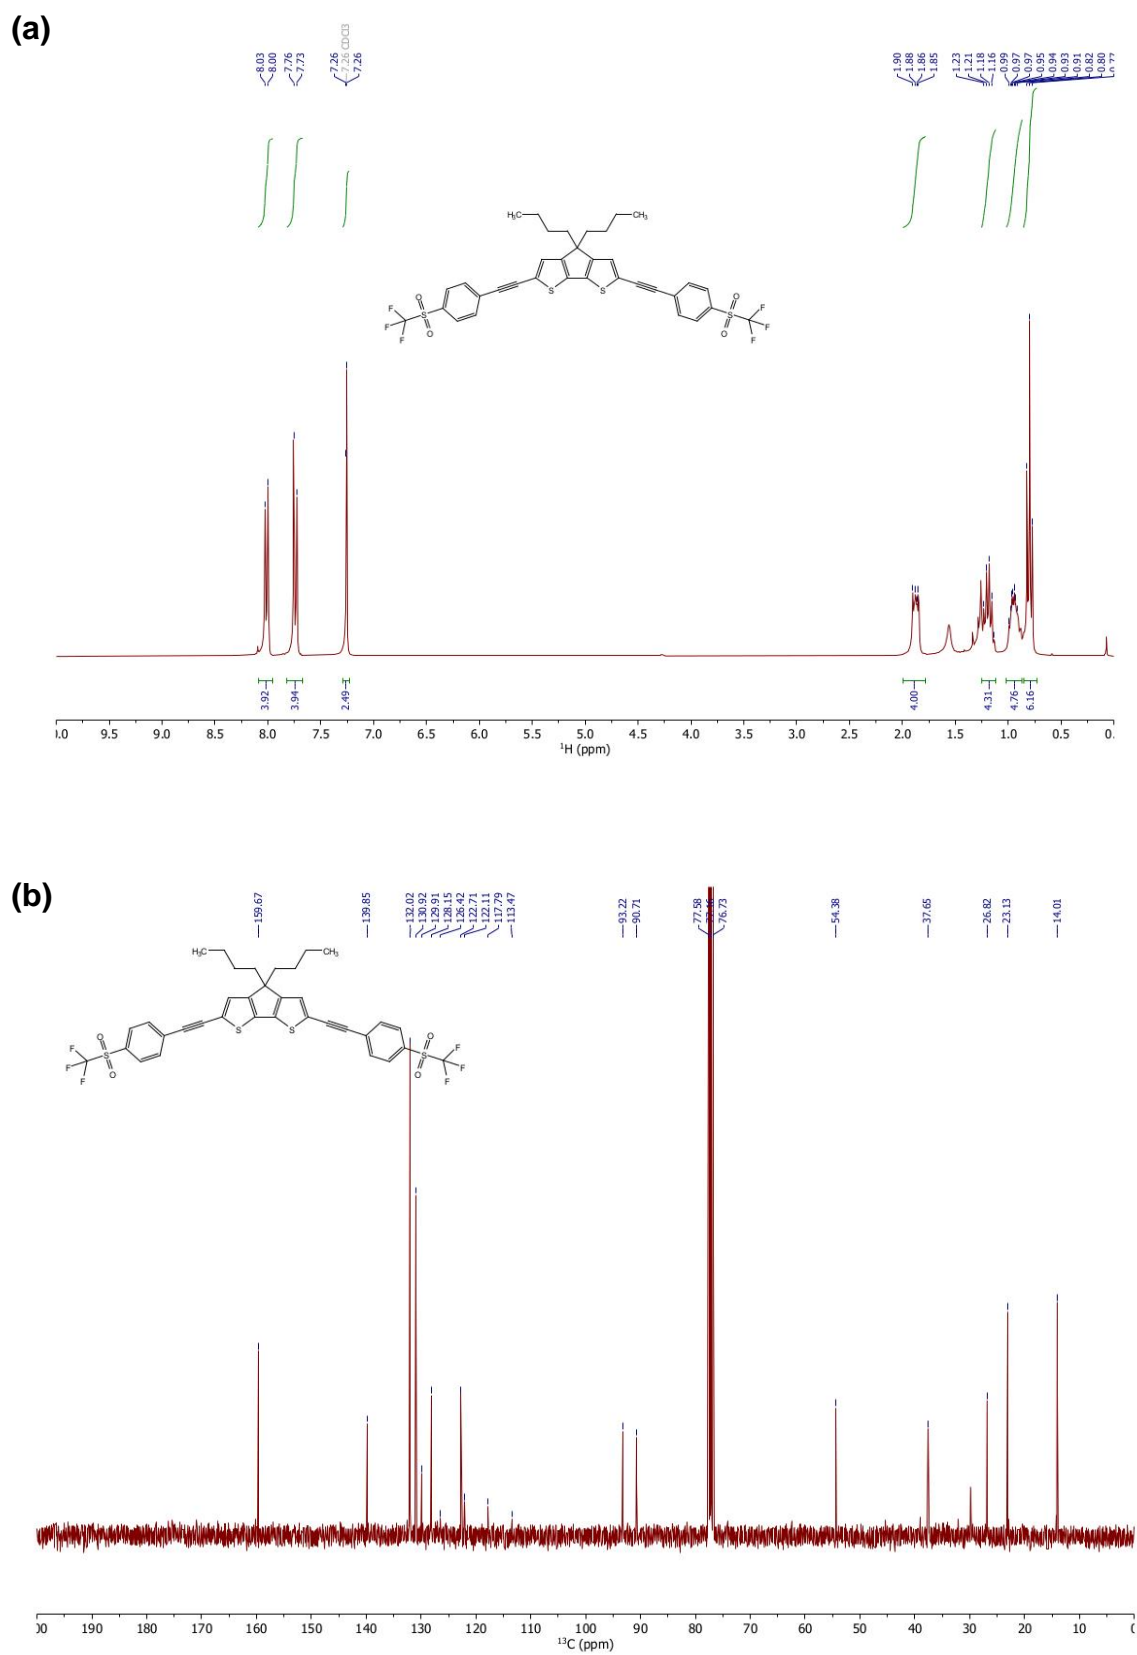

**Figure S4.**  $^1\text{H}$  (a) and  $^{13}\text{C}\{^1\text{H}\}$  (b) NMR spectra at 300 and 75 MHz, respectively, for **2b** in  $\text{CDCl}_3$ .

2b

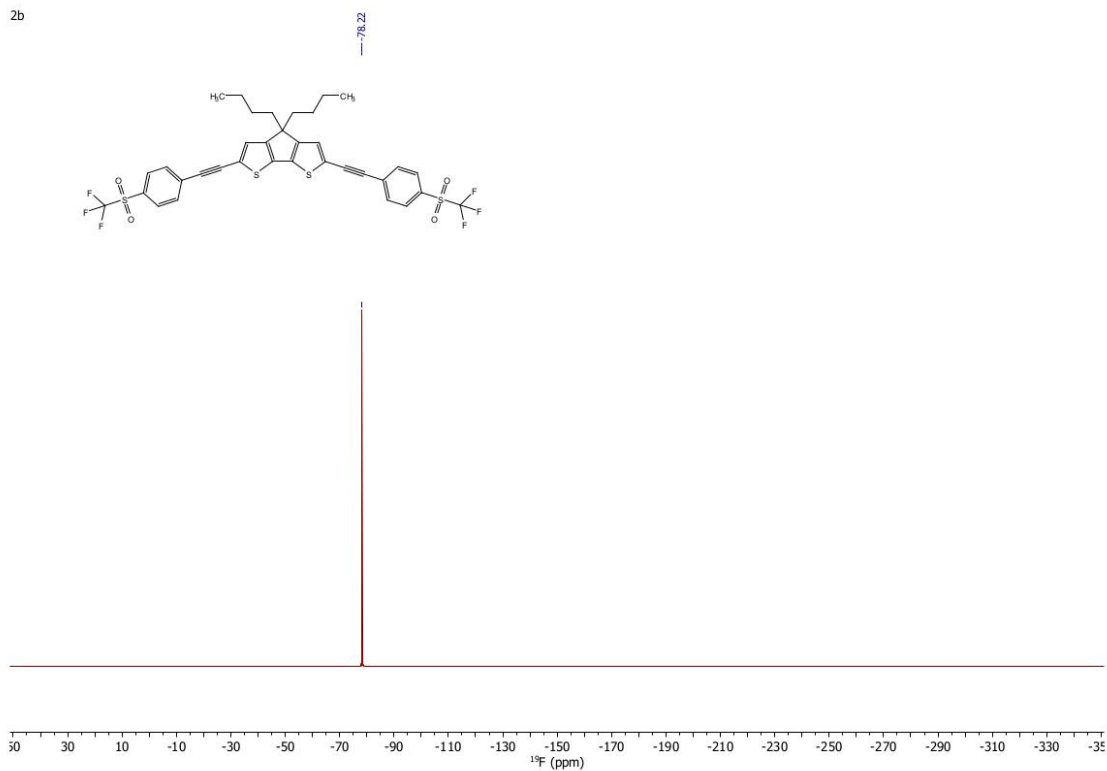

**Figure S5.**  $^{19}\text{F}$  NMR spectrum at 282 MHz for **2b** in  $\text{CDCl}_3$ .

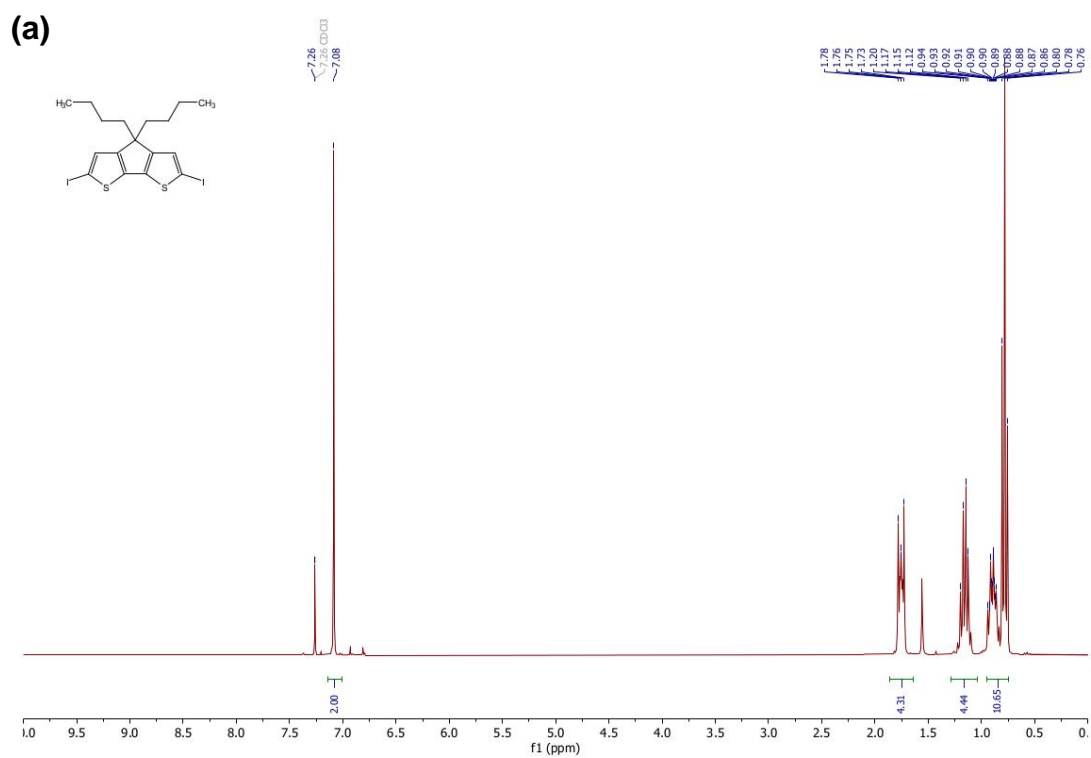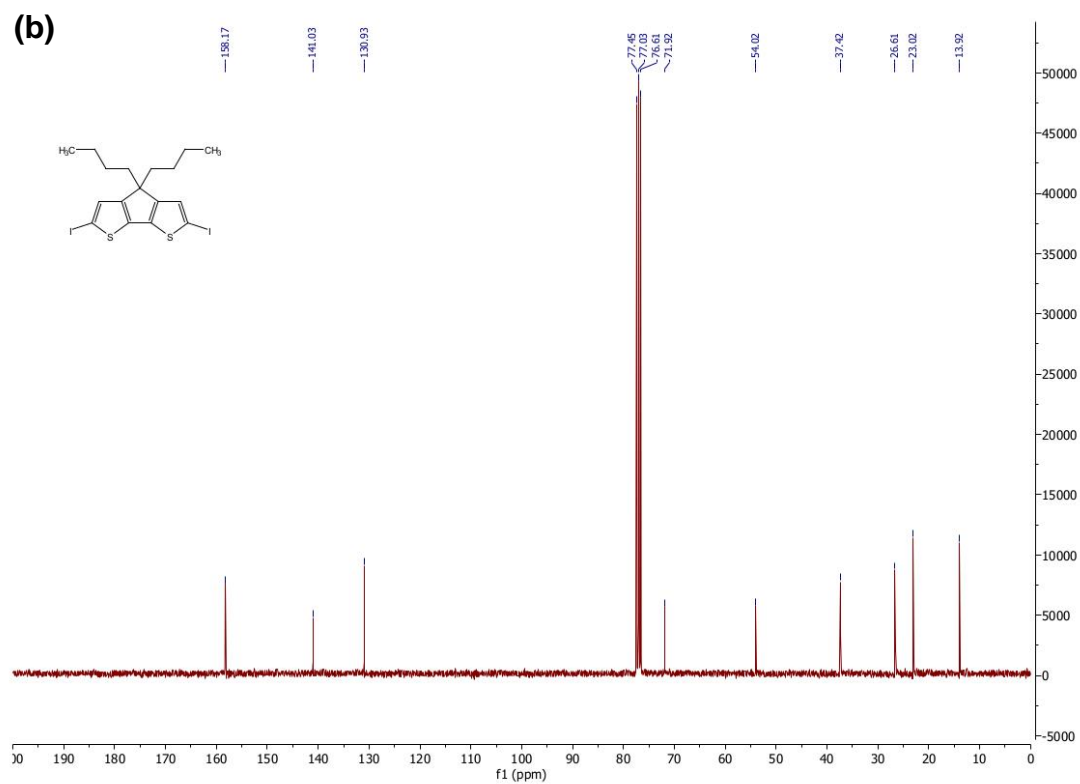

**Figure S6.**  $^1\text{H}$  (a) and  $^{13}\text{C}\{^1\text{H}\}$  (b) NMR spectra at 300 and 75 MHz, respectively, for **9** in  $\text{CDCl}_3$



9

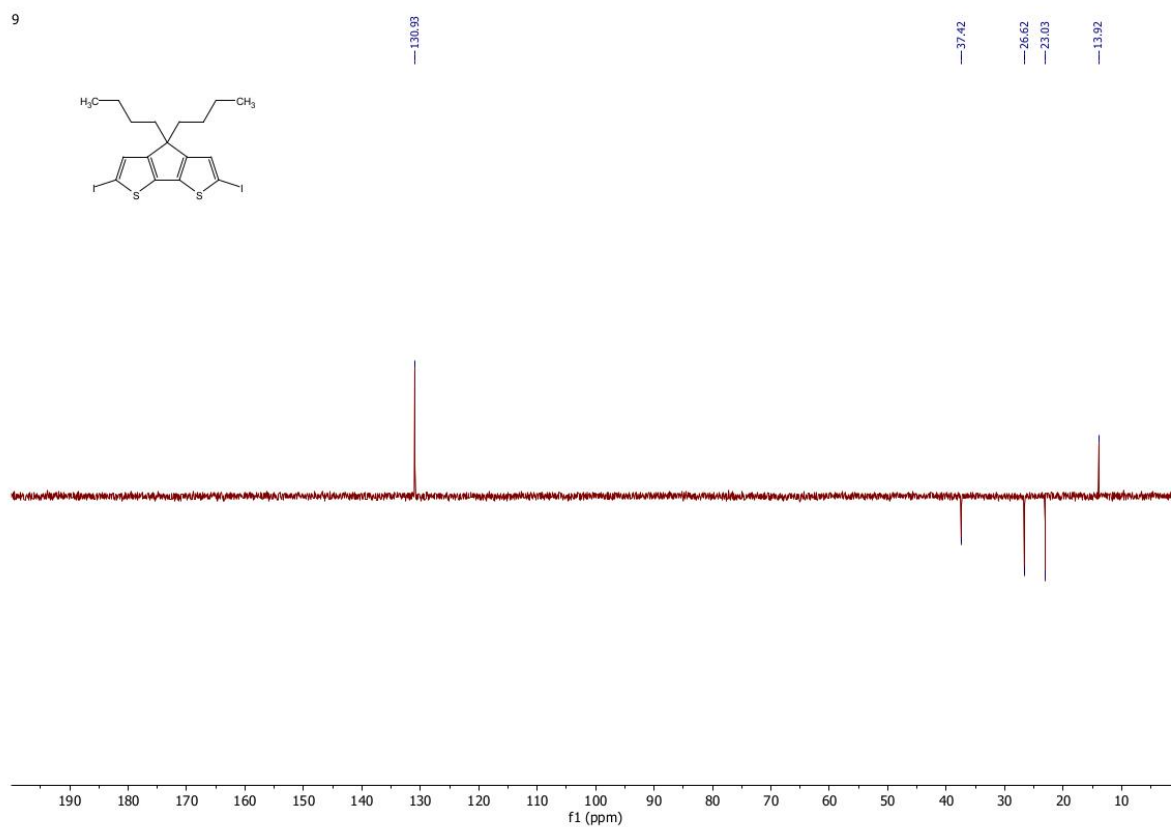

**Figure S7.**  $^{13}\text{C}\{^1\text{H}\}$  DEPT NMR spectrum at 75 MHz for **9** in  $\text{CDCl}_3$

## 2. Two-photon excited fluorescence (2PEF) data for 1a,b and 2a,b

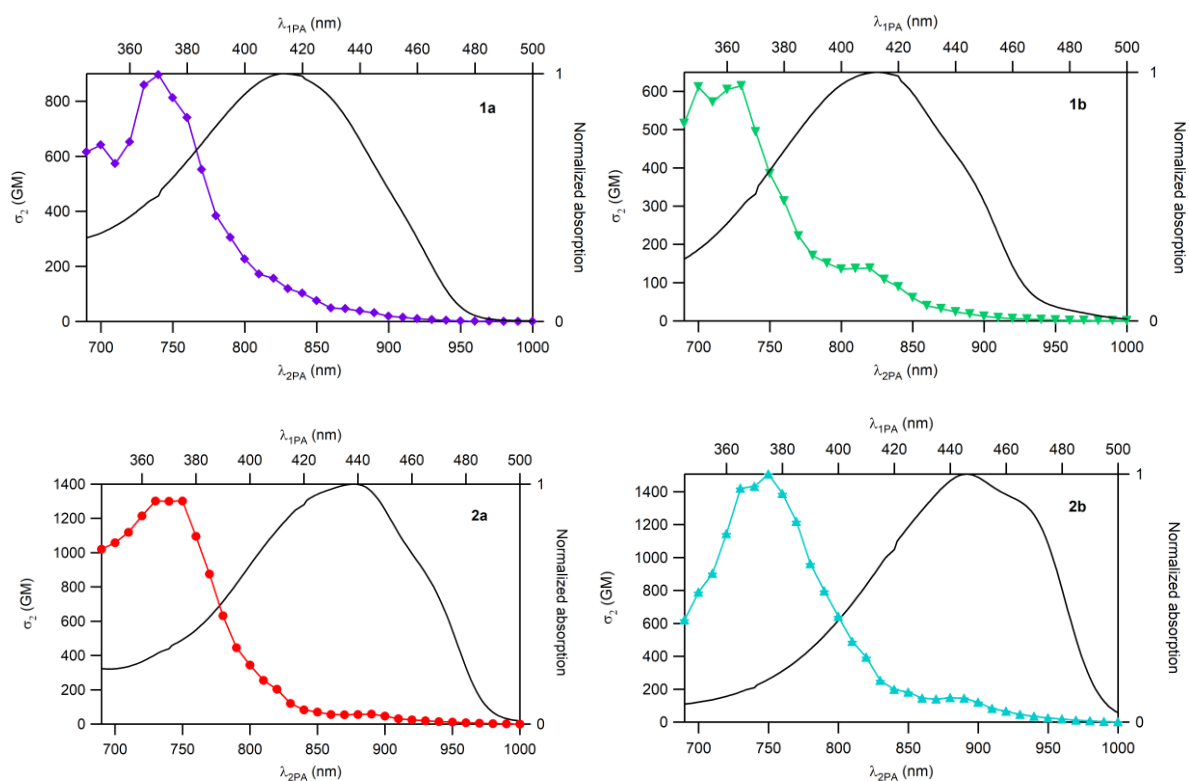

**Figure S8.** Overlay of one- and two-photon absorption spectra for **1a,b** and **2a,b** in toluene (25 °C).

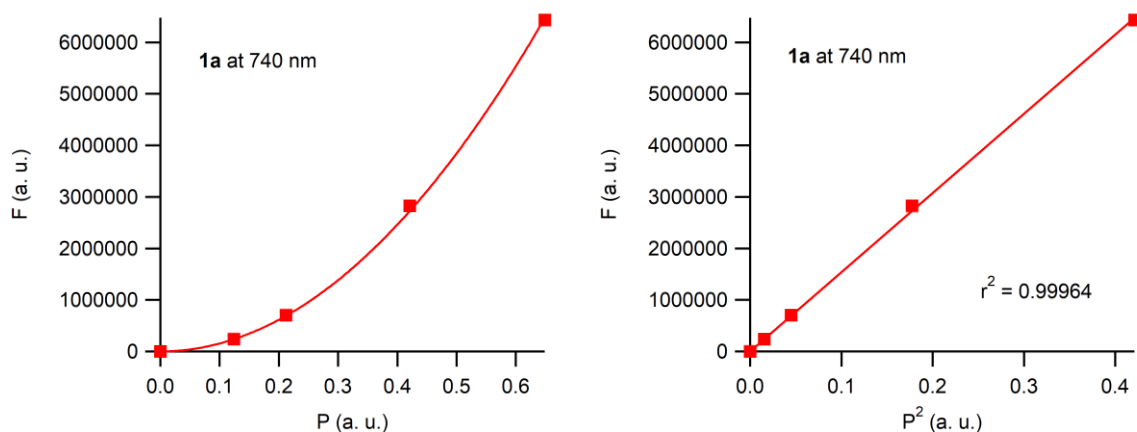

**Figure S9.** Left: quadratic dependence of the emission intensity (F) on laser excitation power (P) for **1a,b** and **2a,b** at their maxima nm in toluene (25 °C). Right: dependence of F on  $P^2$ .

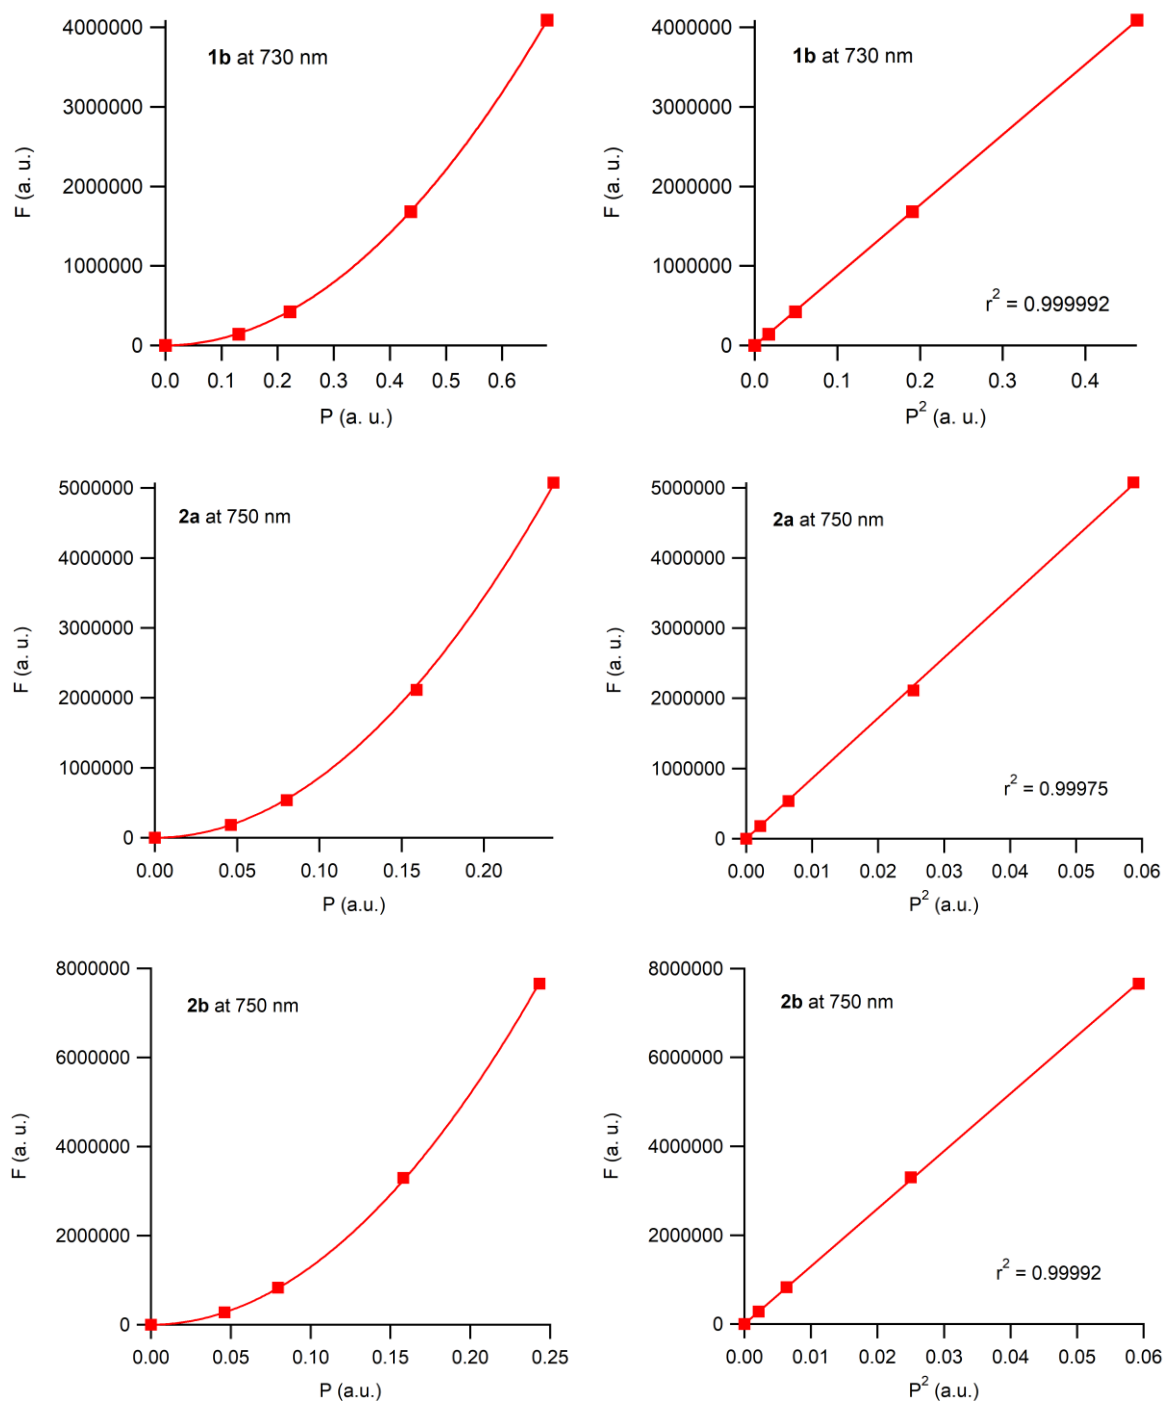

**Figure S9 (continued).** Left: quadratic dependence of the emission intensity ( $F$ ) on laser excitation power ( $P$ ) for **1a,b** and **2a,b** at their maxima nm in toluene (25 °C). Right: dependence of  $F$  on  $P^2$ .

### 3. Conformers and conformational freedom at the PBE0/6-31+G(d) level of theory for 1a,b and 2a,b

#### Molecule 1a

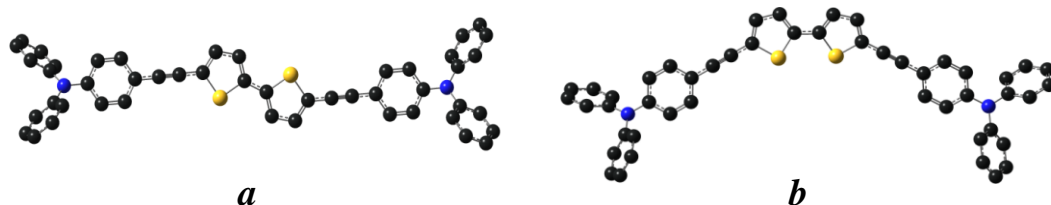

#### Molecule 1b

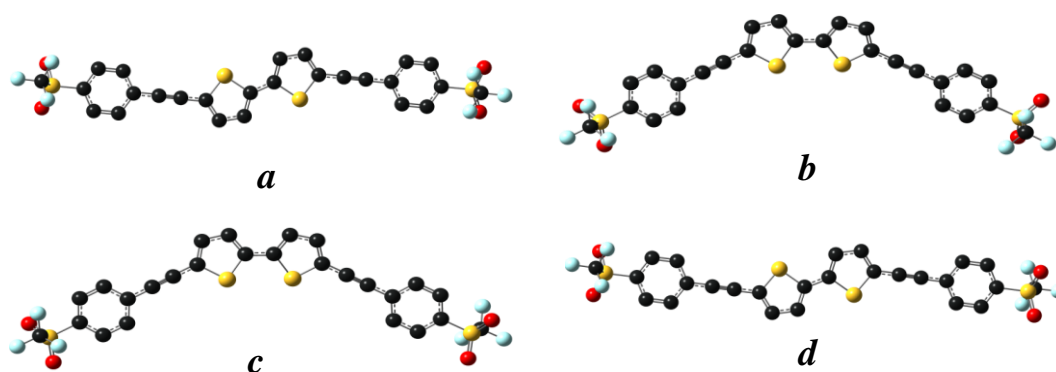

#### Molecule 2a

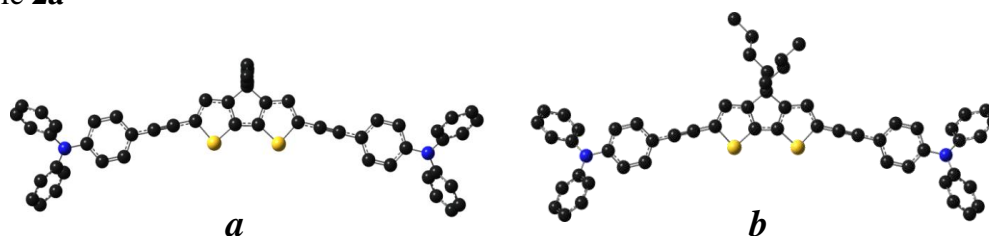

#### Molecule 2b

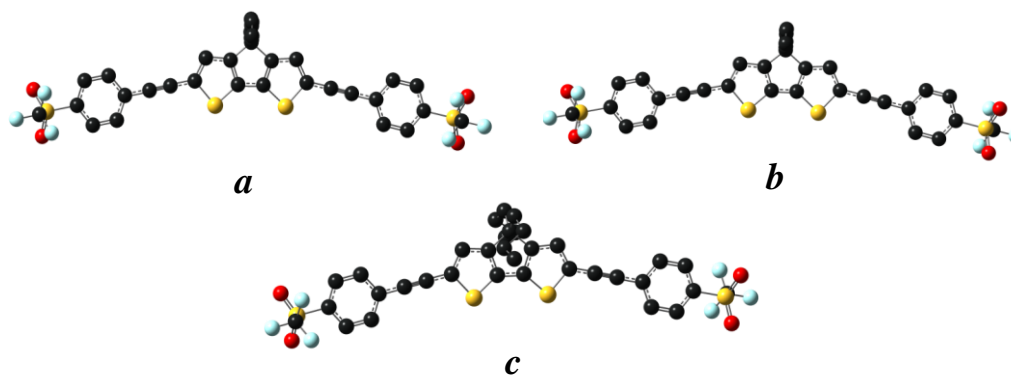

**Figure S10.** PBE0/6-31+G(d)-optimized geometries, using the PCM solvation model in toluene, involving the different configurations of **1a,b**, and **2a,b**. (S, yellow; C, black; H, white; O, red; N, blue; and F, sky blue).

| <b>Table S1.</b> PBE0/6-31+G(d) relative energies ( $\Delta E$ , kcal.mol <sup>-1</sup> ) of the conformers relative to the most stable optimized conformer in level, in toluene. |           |          |           |          |           |          |          |          |           |          |          |
|-----------------------------------------------------------------------------------------------------------------------------------------------------------------------------------|-----------|----------|-----------|----------|-----------|----------|----------|----------|-----------|----------|----------|
| Compound                                                                                                                                                                          | <b>1a</b> |          | <b>2a</b> |          | <b>1b</b> |          |          |          | <b>2b</b> |          |          |
| Form                                                                                                                                                                              | <i>a</i>  | <i>b</i> | <i>a</i>  | <i>b</i> | <i>a</i>  | <i>b</i> | <i>c</i> | <i>d</i> | <i>a</i>  | <i>b</i> | <i>c</i> |
| $\Delta E$                                                                                                                                                                        | 0.00      | 0.80     | 0.00      | 0.80     | 0.00      | 0.00     | 0.70     | 0.70     | 0.00      | 0.10     | 4.30     |

In the most stable configuration (form *a*) of **2a** and **2b**, the two butyl groups are perpendicular to the plane of the molecule. In the case of **1a** and **1b**, a *trans* arrangement is adopted at the bithiophene units. For **2b**, forms *a* and *b* are very close in energy, differing in the orientation of the triflate (SO<sub>2</sub>CF<sub>3</sub>) terminal group. In all of these conformers, the peripheral *para*-substituted phenyleneethynylene arms are coplanar with the bithiophene core. Given their energy differences, all these conformers (apart, perhaps, for isomer *c* of **2b**) should coexist in solution, This is certainly the case for the *cis* and *trans* conformers of **1a** and **1b**.

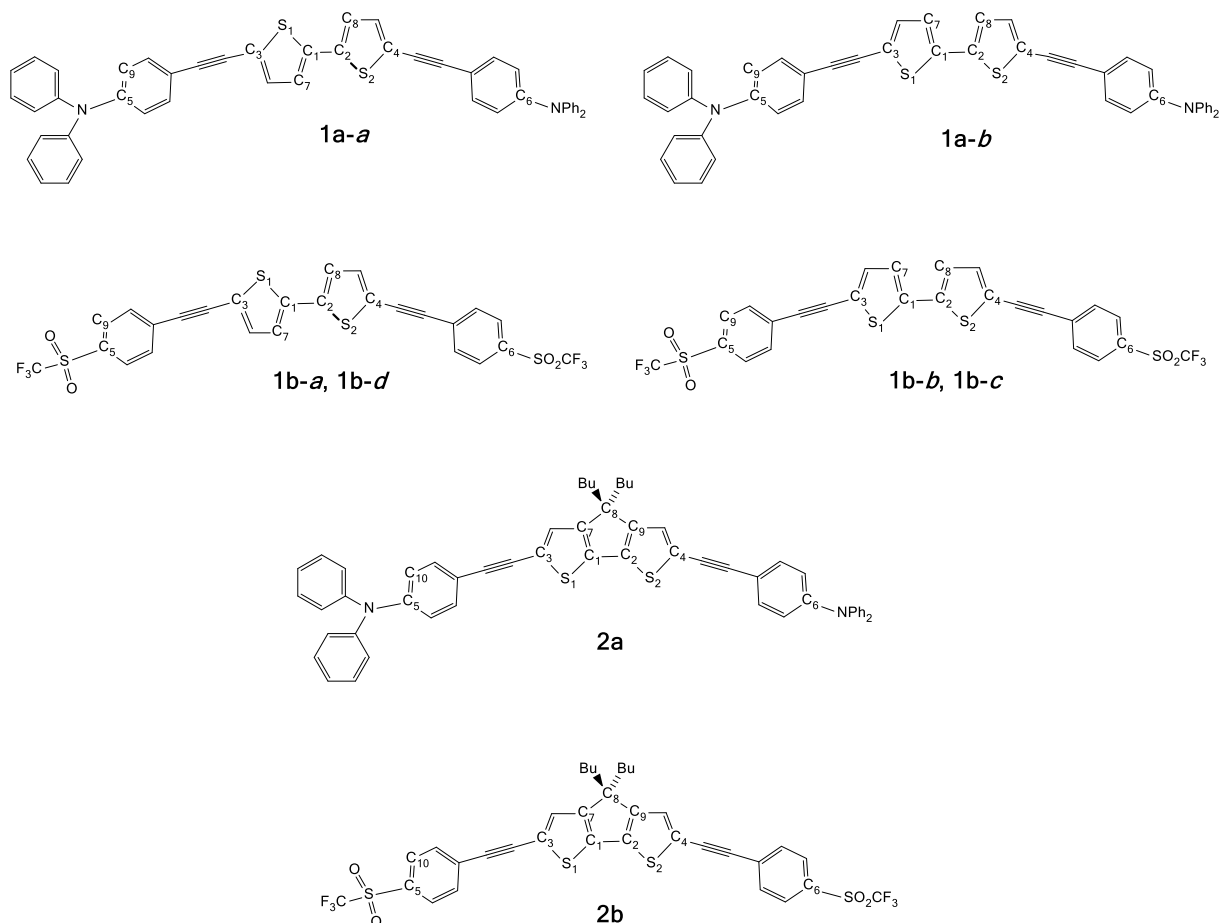

**Scheme S1.** Atom numbering in the **1a,b** and **2a,b** series of compounds. Hydrogen atoms omitted for clarity.

Pertinent calculated important geometrical parameters are presented (below) in Table S2. The data shows that the bond lengths and bond angles remain unchanged in the different conformers of a given compound. Trigonal planar sulfur atoms are observed in all compounds. The bond

angle at the sulfur is around 93°, the C-C-S angle is around 109° and the other two carbons show a bond angle around 114°. The C-C bonds of the carbons adjacent to the sulfur are about 1.34 Å, the C-S bond length is around 1.70 Å, and the other C-C bond is about 1.41 Å. Different types of dihedral angles are considered to describe the geometry of the considered bi-thiophene derivatives (Scheme S1). These dihedral angles do not vary significantly from a *trans* form to a *cis* form of the thiophene rings.

| Table S2. Pertinent computed bond lengths (Å), bond angles (°), and dihedral angles (°) for compounds 1a-2b. See Scheme S1 for the atom numbering. |                       |          |          |          |
|----------------------------------------------------------------------------------------------------------------------------------------------------|-----------------------|----------|----------|----------|
| 2b                                                                                                                                                 | S <sub>0toluene</sub> |          |          |          |
| Bond lengths                                                                                                                                       | <i>a</i>              | <i>b</i> | <i>c</i> |          |
| S <sub>1</sub> -C <sub>1</sub> (Or S <sub>2</sub> -C <sub>2</sub> )                                                                                | 1.712                 | 1.711    | 1.711    |          |
| C <sub>1</sub> -C <sub>2</sub>                                                                                                                     | 1.434                 | 1.432    | 1.432    |          |
| S <sub>1</sub> -C <sub>3</sub> (Or S <sub>2</sub> -C <sub>4</sub> )                                                                                | 1.756                 | 1.756    | 1.757    |          |
| S-C <sub>5</sub> (Or S-C <sub>6</sub> )                                                                                                            | 1.765                 | 1.765    | 1.765    |          |
| Bond angles                                                                                                                                        |                       |          |          |          |
| C <sub>1</sub> -S <sub>1</sub> -C <sub>3</sub> (Or C <sub>2</sub> -S <sub>2</sub> -C <sub>4</sub> )                                                | 90.6                  | 90.6     | 90.5     |          |
| C <sub>5</sub> -S-C (Or C <sub>6</sub> -S-C)                                                                                                       | 103.2                 | 103.2    | 130.2    |          |
| C <sub>7</sub> -C <sub>8</sub> -C <sub>9</sub>                                                                                                     | 100.2                 | 100.2    | 100.3    |          |
| Dihedral angles                                                                                                                                    |                       |          |          |          |
| S <sub>1</sub> -C <sub>1</sub> -C <sub>2</sub> -C <sub>9</sub> (Or S <sub>2</sub> -C <sub>2</sub> -C <sub>1</sub> -C <sub>7</sub> )                | 0.02                  | 0.12     | 0.5      |          |
| C <sub>3</sub> -S <sub>1</sub> -C <sub>1</sub> -C <sub>2</sub> (Or C <sub>4</sub> -S <sub>2</sub> -C <sub>2</sub> -C <sub>1</sub> )                | 0.05                  | 0.07     | 0.9      |          |
| C <sub>10</sub> -C <sub>5</sub> -S-C                                                                                                               | 90.1                  | 90.2     | 90.2     |          |
| 1b                                                                                                                                                 | S <sub>0toluene</sub> |          |          |          |
| Bond lengths                                                                                                                                       | <i>a</i>              | <i>b</i> | <i>c</i> | <i>d</i> |
| S <sub>1</sub> -C <sub>1</sub> (Or S <sub>2</sub> -C <sub>2</sub> )                                                                                | 1.734                 | 1.734    | 1.733    | 1.733    |
| C <sub>1</sub> -C <sub>2</sub>                                                                                                                     | 1.443                 | 1.443    | 1.445    | 1.445    |
| S <sub>1</sub> -C <sub>3</sub> (Or S <sub>2</sub> -C <sub>4</sub> )                                                                                | 1.742                 | 1.742    | 1.742    | 1.741    |
| S-C <sub>5</sub> (Or S-C <sub>6</sub> )                                                                                                            | 1.766                 | 1.766    | 1.766    | 1.766    |
| Bond angles                                                                                                                                        |                       |          |          |          |
| C <sub>1</sub> -S <sub>1</sub> -C <sub>3</sub> (Or C <sub>2</sub> -S <sub>2</sub> -C <sub>4</sub> )                                                | 92.0                  | 92.0     | 91.9     | 92.0     |
| C <sub>5</sub> -S-C (Or C <sub>6</sub> -S-C)                                                                                                       | 103.1                 | 103.2    | 103.1    | 103.1    |
| Dihedral angles                                                                                                                                    |                       |          |          |          |
| S <sub>1</sub> -C <sub>1</sub> -C <sub>2</sub> -S <sub>2</sub>                                                                                     | 14                    | -        | -        | 17.1     |
| S <sub>1</sub> -C <sub>1</sub> -C <sub>2</sub> -C <sub>8</sub> (Or S <sub>2</sub> -C <sub>2</sub> -C <sub>1</sub> -C <sub>7</sub> )                | -                     | 22.2     | 20.8     | -        |

|                                                                                                                                                                                                                                                                                                                                                                                     |                                             |                                  |           |           |
|-------------------------------------------------------------------------------------------------------------------------------------------------------------------------------------------------------------------------------------------------------------------------------------------------------------------------------------------------------------------------------------|---------------------------------------------|----------------------------------|-----------|-----------|
| C <sub>3</sub> -S <sub>1</sub> -C <sub>1</sub> -C <sub>2</sub> (Or C <sub>4</sub> -S <sub>2</sub> -C <sub>2</sub> -C <sub>1</sub> )<br>C <sub>9</sub> -C <sub>5</sub> -S-C                                                                                                                                                                                                          | 0.4<br>89.9                                 | 0.1<br>90                        | 0.1<br>90 | 0.6<br>90 |
| <b>1a</b><br>Bond lengths                                                                                                                                                                                                                                                                                                                                                           | S <sub>0</sub> toluene<br><i>a</i> <i>b</i> |                                  |           |           |
| S <sub>1</sub> -C <sub>1</sub> (Or S <sub>2</sub> -C <sub>2</sub> )<br>C <sub>1</sub> -C <sub>2</sub><br>S <sub>1</sub> -C <sub>3</sub> (Or S <sub>2</sub> -C <sub>4</sub> )<br>C <sub>5</sub> -N (Or C <sub>6</sub> -N)                                                                                                                                                            | 1.738<br>1.443<br>1.744<br>1.404            | 1.737<br>1.445<br>1.743<br>1.404 |           |           |
| Bond angles                                                                                                                                                                                                                                                                                                                                                                         |                                             |                                  |           |           |
| C <sub>1</sub> -S <sub>1</sub> -C <sub>3</sub> (Or C <sub>2</sub> -S <sub>2</sub> -C <sub>4</sub> )<br>C <sub>5</sub> -N-C (Or C <sub>6</sub> -N-C)                                                                                                                                                                                                                                 | 92.2<br>120.4                               | 92.2<br>120.4                    |           |           |
| Dihedral angles                                                                                                                                                                                                                                                                                                                                                                     |                                             |                                  |           |           |
| S <sub>1</sub> -C <sub>1</sub> -C <sub>2</sub> -S <sub>2</sub><br>S <sub>1</sub> -C <sub>1</sub> -C <sub>2</sub> -C <sub>8</sub> (Or S <sub>2</sub> -C <sub>2</sub> -C <sub>1</sub> -C <sub>7</sub> )<br>C <sub>3</sub> -S <sub>1</sub> -C <sub>1</sub> -C <sub>2</sub> (Or C <sub>4</sub> -S <sub>2</sub> -C <sub>2</sub> -C <sub>1</sub> )<br>C <sub>9</sub> -C <sub>5</sub> -N-C | 16<br>-<br>0.5<br>35                        | -<br>23.2<br>0.3<br>35           |           |           |
| <b>2a</b><br>Bond lengths                                                                                                                                                                                                                                                                                                                                                           | S <sub>0</sub> toluene<br><i>a</i> <i>b</i> |                                  |           |           |
| S <sub>1</sub> -C <sub>1</sub> (Or S <sub>2</sub> -C <sub>2</sub> )<br>C <sub>1</sub> -C <sub>2</sub><br>S <sub>1</sub> -C <sub>3</sub> (Or S <sub>2</sub> -C <sub>4</sub> )<br>C <sub>5</sub> -N (Or C <sub>6</sub> -N)                                                                                                                                                            | 1.714<br>1.434<br>1.758<br>1.405            | 1.714<br>1.431<br>1.757<br>1.405 |           |           |
| Bond angles                                                                                                                                                                                                                                                                                                                                                                         |                                             |                                  |           |           |
| C <sub>1</sub> -S <sub>1</sub> -C <sub>3</sub> (Or C <sub>2</sub> -S <sub>2</sub> -C <sub>4</sub> )<br>C <sub>7</sub> -C <sub>8</sub> -C <sub>9</sub><br>C <sub>5</sub> -N-C                                                                                                                                                                                                        | 90.8<br>100.3<br>120.3                      | 90.7<br>100.1<br>120.4           |           |           |
| Dihedral angles                                                                                                                                                                                                                                                                                                                                                                     |                                             |                                  |           |           |
| C <sub>3</sub> -S <sub>1</sub> -C <sub>1</sub> -C <sub>2</sub> (Or C <sub>4</sub> -S <sub>2</sub> -C <sub>2</sub> -C <sub>1</sub> )<br>S <sub>1</sub> -C <sub>1</sub> -C <sub>2</sub> -C <sub>8</sub> (Or S <sub>2</sub> -C <sub>2</sub> -C <sub>1</sub> -C <sub>7</sub> )<br>C <sub>9</sub> -C <sub>5</sub> -N-C                                                                   | 0.1<br>0.1<br>36.2                          | 3.0<br>2.4<br>36                 |           |           |

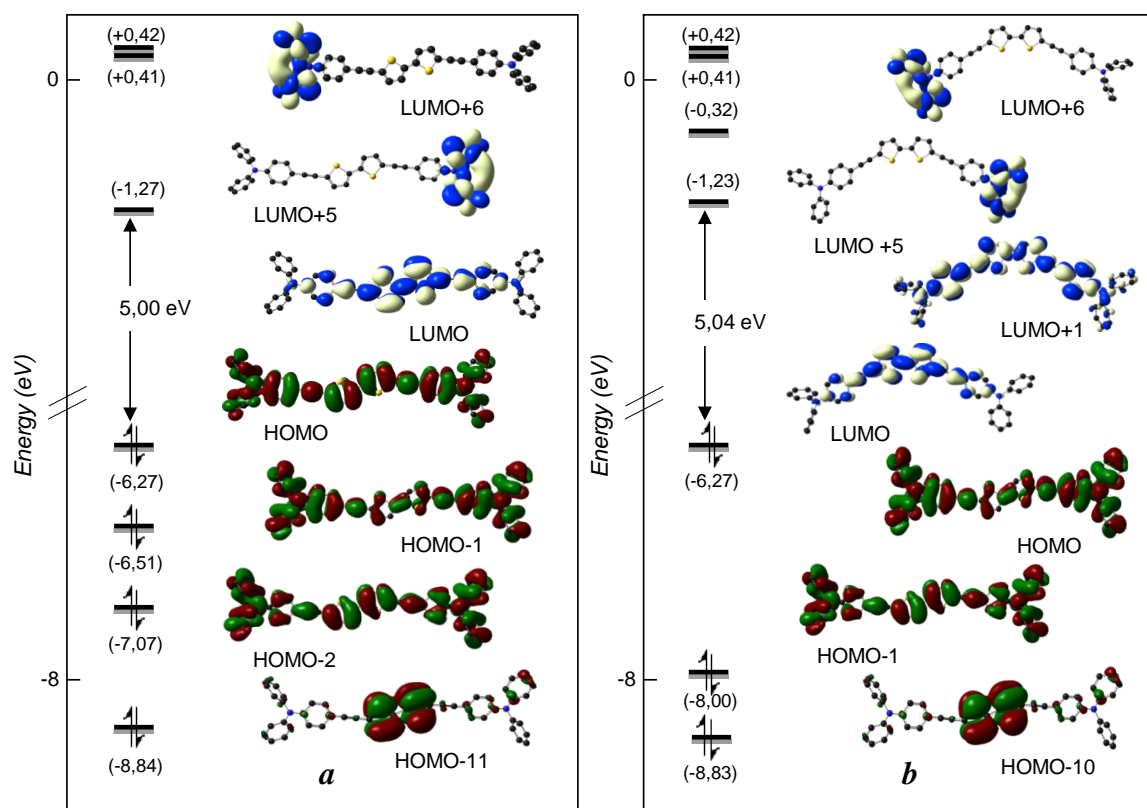

**Figure S11.** Frontier molecular orbital (MO) diagram of **1a** in toluene. Contour isodensity values are  $\pm 0.02$  (e/bohr<sup>3</sup>)<sup>1/2</sup>.

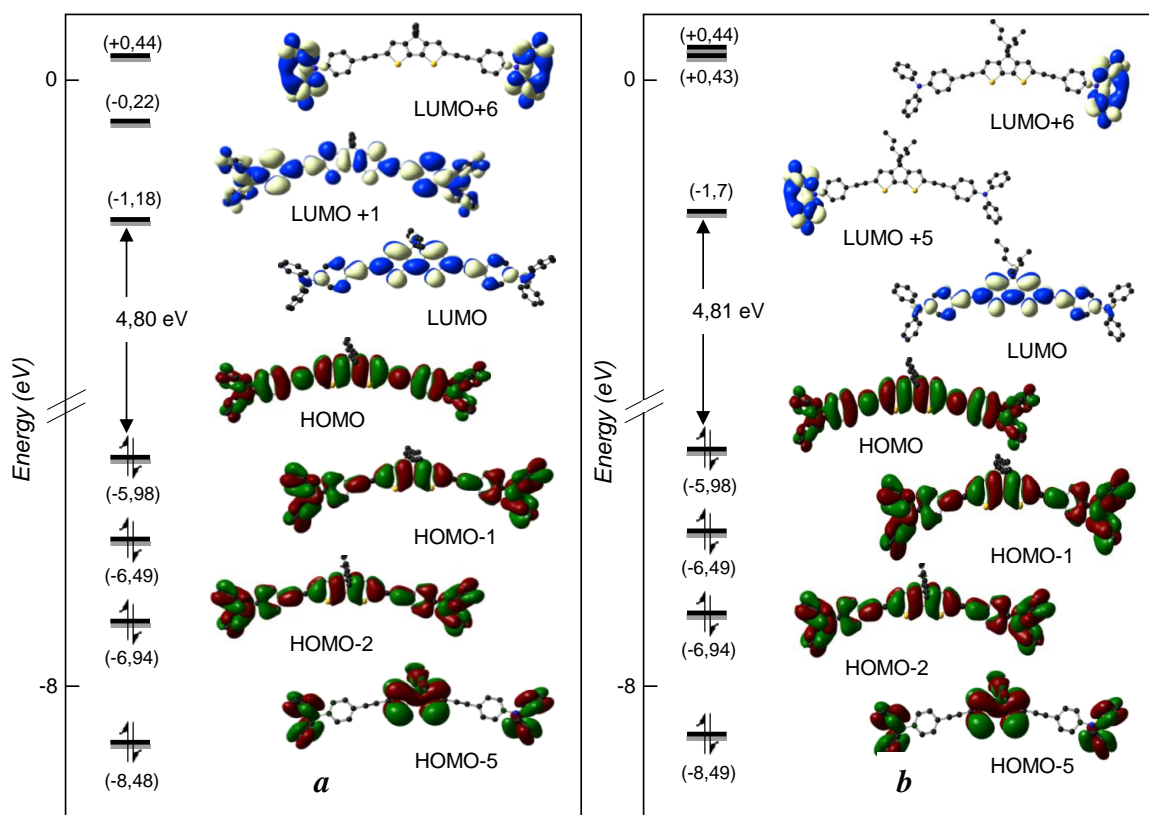

**Figure S12.** Frontier molecular orbital (MO) diagram of **2a** in toluene. Contour isodensity values are  $\pm 0.02$  (e/bohr<sup>3</sup>)<sup>1/2</sup>.



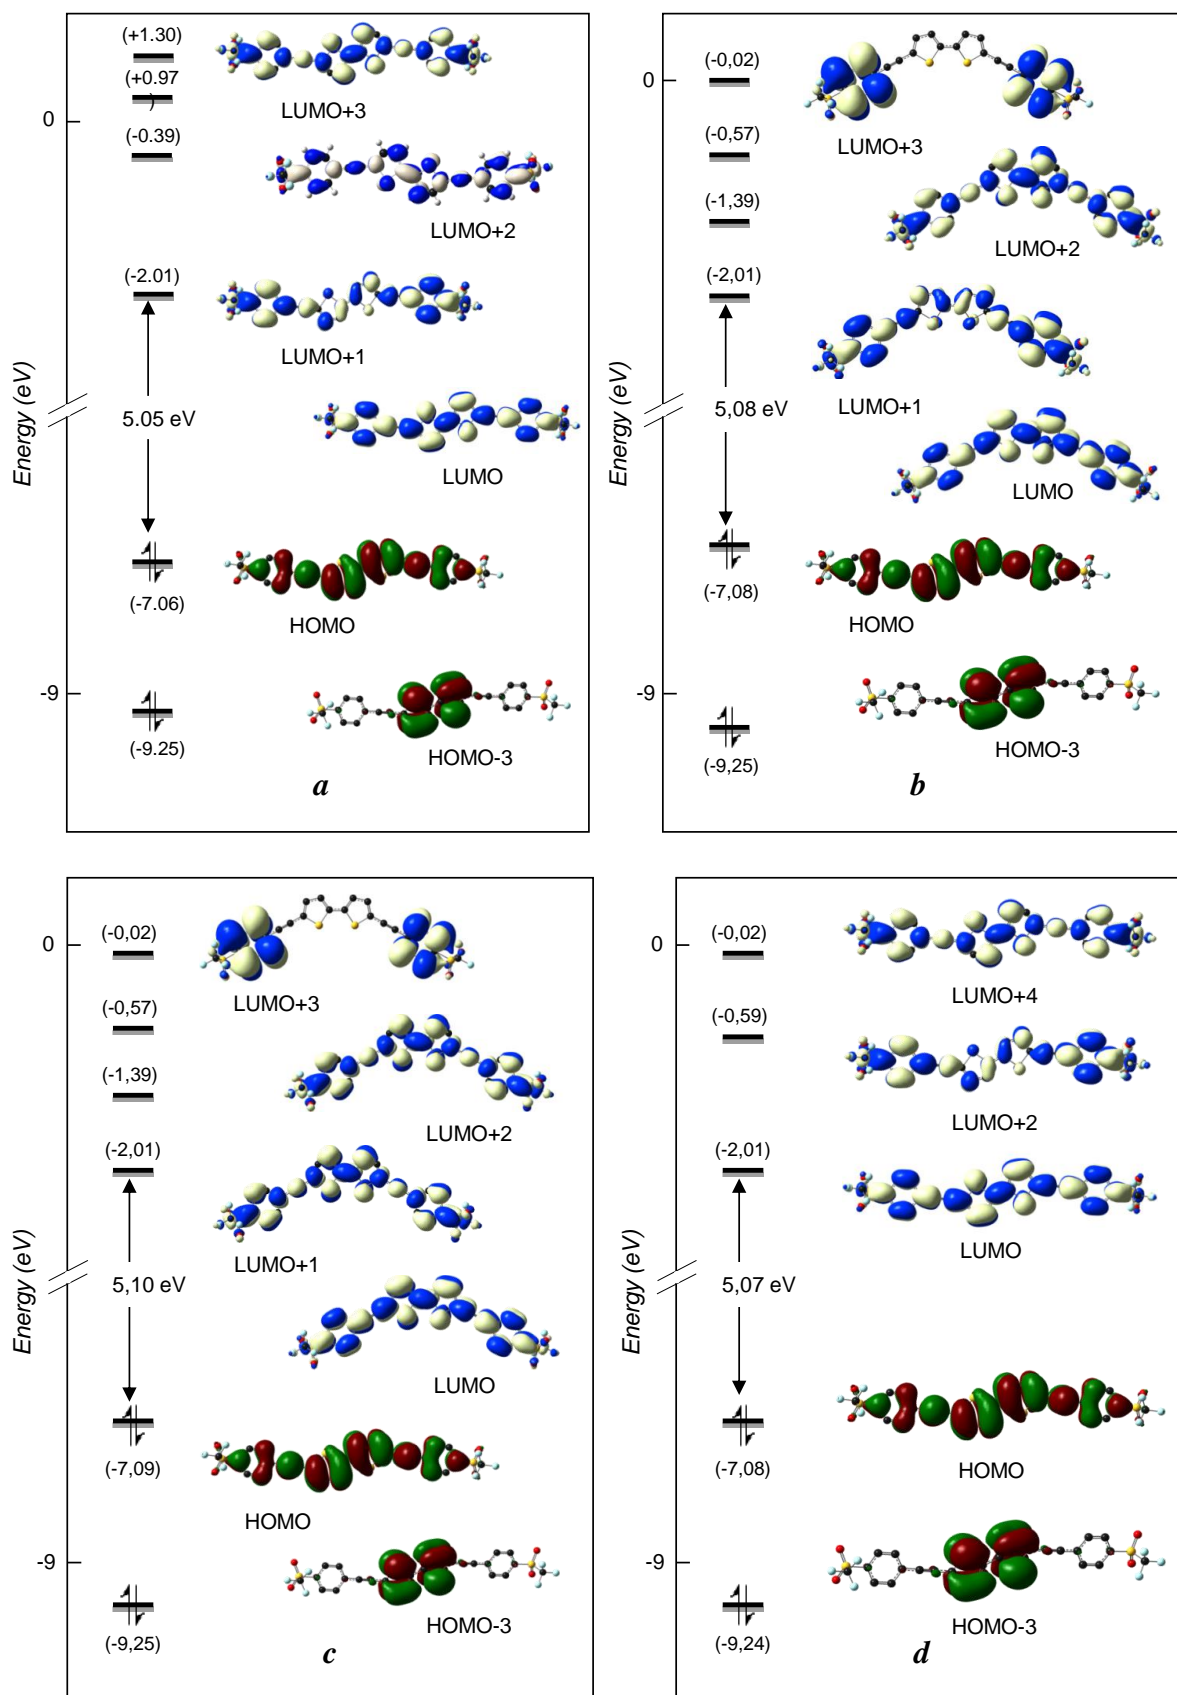

**Figure S13.** Frontier molecular orbital (MO) diagram of **1b** in toluene. Contour isodensity values are  $\pm 0.02$  ( $\text{e}/\text{bohr}^3$ )<sup>1/2</sup>.

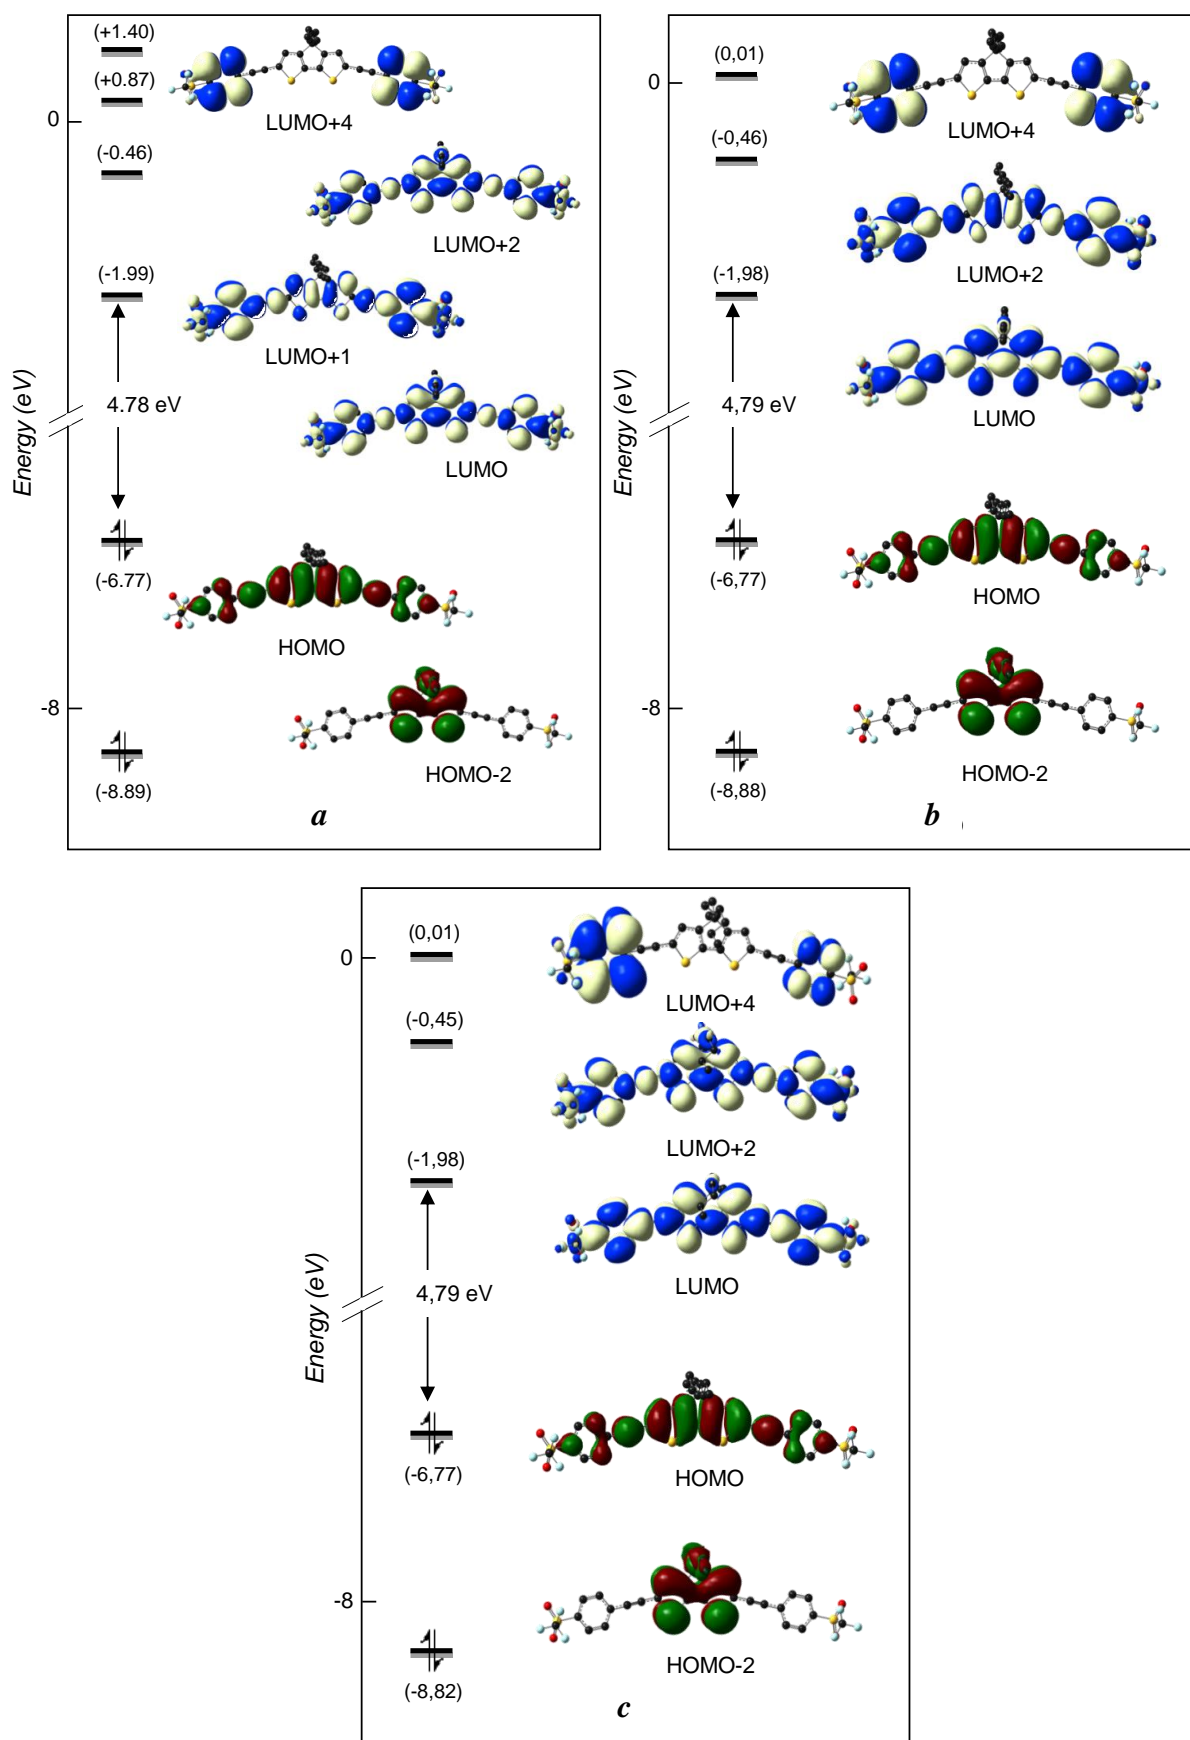

**Figure S14.** Frontier molecular orbital (MO) diagram of **2b** in toluene. Contour isodensity values are  $\pm 0.02$  (e/bohr<sup>3</sup>)<sup>1/2</sup>.

#### 4. TD-DFT calculations for 1a,b and 2a,b

**Table S3.** Experimental and theoretical UV-vis absorption maxima ( $\lambda_{\max}$  (nm)) for the most stable form (*a*) of compounds **1a-2b** in toluene.

| Compound  | $\lambda_{\max}^{abs}$ (nm) |           |     |
|-----------|-----------------------------|-----------|-----|
|           | PBE0                        | CAM-B3LYP | Exp |
| <b>1a</b> | 500                         | 433       | 414 |
| <b>1b</b> | 477                         | 426       | 413 |
| <b>2a</b> | 520                         | 454       | 438 |
| <b>2b</b> | 525                         | 455       | 446 |

**Table S4.** CAM-B3LYP calculations for the four lowest-energy electronic transitions of **1a,b**, and **2a,b** in toluene (PCM approach).  $S_n$  is the excited state number,  $E_{0n}$  is the transition energy (in eV),  $\lambda_{\text{calc}}$  is the wavelength (in nm) and  $f_{0n}$  is the oscillator strength of the absorption transition.

| Molecule          | $S_n$ | $E_{0n}$ | $\lambda_{\text{calc}}$ | $f_{0n}$ | Main MO transition percentage      |
|-------------------|-------|----------|-------------------------|----------|------------------------------------|
| <b>Complex 2b</b> |       |          |                         |          |                                    |
| <b>a</b>          | 1     | 2.86     | 455                     | 2.40     | HOMO $\rightarrow$ LUMO (90%)      |
|                   | 2     | 3.64     | 340                     | 0.11     | HOMO $\rightarrow$ LUMO+1 (72 %)   |
|                   | 3     | 4.42     | 281                     | 0.37     | HOMO $\rightarrow$ LUMO+2 (73 %)   |
|                   | 6     | 4.77     | 260                     | 0.22     | HOMO-2 $\rightarrow$ LUMO (77 %)   |
|                   | 18    | 5.42     | 229                     | 0.22     | HOMO $\rightarrow$ LUMO+4(47 %)    |
| <b>b</b>          |       |          |                         |          | HOMO-6 $\rightarrow$ LUMO+1 (28 %) |
|                   | 1     | 2.72     | 455                     | 2.40     | HOMO $\rightarrow$ LUMO (90%)      |
|                   | 3     | 4.42     | 281                     | 0.37     | HOMO $\rightarrow$ LUMO+2 (73 %)   |
|                   | 6     | 4.77     | 260                     | 0.22     | HOMO-2 $\rightarrow$ LUMO (77 %)   |
|                   | 18    | 5.42     | 229                     | 0.22     | HOMO $\rightarrow$ LUMO+3 (48 %)   |
| <b>c</b>          | 1     | 2.73     | 454                     | 2.38     | HOMO $\rightarrow$ LUMO (90%)      |
|                   | 3     | 4.41     | 281                     | 0.38     | HOMO $\rightarrow$ LUMO+2 (72 %)   |
|                   | 6     | 4.74     | 262                     | 0.20     | HOMO-2 $\rightarrow$ LUMO (80 %)   |
|                   | 18    | 5.42     | 229                     | 0.22     | HOMO $\rightarrow$ LUMO+4 (40 %)   |
| <b>Complex 1b</b> |       |          |                         |          |                                    |
| <b>a</b>          | 1     | 2.74     | 426                     | 2.44     | HOMO $\rightarrow$ LUMO (89%)      |
|                   | 2     | 3.74     | 331                     | 0.003    | HOMO $\rightarrow$ LUMO+1 (65 %)   |
|                   | 4     | 4.48     | 277                     | 0.38     | HOMO $\rightarrow$ LUMO+2 (58 %)   |
|                   | 10    | 4.97     | 250                     | 0.23     | HOMO-1 $\rightarrow$ LUMO+1 (21 %) |
|                   |       |          |                         |          | HOMO-3 $\rightarrow$ LUMO (33 %)   |
|                   | 18    | 5.55     | 223                     | 0.26     | HOMO $\rightarrow$ LUMO+3 (53 %)   |

|                   |    |      |     |       |                                                                                                 |
|-------------------|----|------|-----|-------|-------------------------------------------------------------------------------------------------|
| <b><i>b</i></b>   | 1  | 2.95 | 420 | 2.17  | HOMO → LUMO (89%)                                                                               |
|                   | 2  | 3.77 | 330 | 0.45  | HOMO → LUMO+1 (63 %)                                                                            |
|                   | 4  | 4.50 | 275 | 0.20  | HOMO→ LUMO+2 (56 %)                                                                             |
|                   | 11 | 4.98 | 250 | 0.21  | HOMO-3 → LUMO (73 %)                                                                            |
|                   | 18 | 5.56 | 222 | 0.20  | HOMO → LUMO+3 (27 %)                                                                            |
| <b><i>c</i></b>   | 1  | 2.96 | 418 | 2.17  | HOMO → LUMO (89%)                                                                               |
|                   | 2  | 3.77 | 329 | 0.44  | HOMO→ LUMO+1 (63 %)                                                                             |
|                   | 4  | 4.51 | 275 | 0.20  | HOMO→ LUMO+2 (55 %)                                                                             |
|                   | 11 | 4.99 | 249 | 0.20  | HOMO-3 → LUMO (73 %)                                                                            |
|                   | 18 | 5.57 | 223 | 0.19  | HOMO → LUMO+3 (52 %)                                                                            |
| <b><i>d</i></b>   | 1  | 2.93 | 423 | 2.44  | HOMO → LUMO (89%)                                                                               |
|                   | 4  | 4.49 | 276 | 0.37  | HOMO → LUMO+2 (58 %)                                                                            |
|                   | 10 | 4.98 | 250 | 0.23  | HOMO-3 → LUMO (66 %)                                                                            |
|                   | 18 | 5.56 | 223 | 0.26  | HOMO → LUMO+4 (40 %)                                                                            |
| <b>Complex 1a</b> |    |      |     |       |                                                                                                 |
| <b><i>a</i></b>   | 1  | 2.88 | 433 | 2.89  | HOMO → LUMO (79%)                                                                               |
|                   | 2  | 3.50 | 354 | 0.008 | HOMO-1 → LUMO (48 %)                                                                            |
|                   | 3  | 3.97 | 313 | 0.37  | HOMO-2 → LUMO (48 %)                                                                            |
|                   | 8  | 4.33 | 286 | 0.54  | HOMO-1 → LUMO+6 (26 %)                                                                          |
|                   | 27 | 5.26 | 236 | 0.23  | HOMO→ LUMO+5 (17 %)<br>HOMO-11 → LUMO (42 %)                                                    |
| <b><i>b</i></b>   | 1  | 2.89 | 429 | 2.54  | HOMO → LUMO (79%)                                                                               |
|                   | 2  | 3.51 | 352 | 0.55  | HOMO-1 → LUMO (49 %)                                                                            |
|                   | 8  | 4.33 | 286 | 0.44  | HOMO → LUMO+1 (34 %)<br>HOMO→ LUMO+6 (26 %)<br>HOMO-1 → LUMO+5 (22 %)<br>HOMO-1 → LUMO+6 (21 %) |
|                   | 23 | 5.15 | 241 | 0.14  | HOMO-10→ LUMO (48 %)                                                                            |
| <b>Complex 2a</b> |    |      |     |       |                                                                                                 |
| <b><i>a</i></b>   | 1  | 2.73 | 454 | 2.80  | HOMO → LUMO (85%)                                                                               |
|                   | 2  | 3.51 | 353 | 0.13  | HOMO-1 → LUMO (46 %)                                                                            |
|                   | 3  | 3.95 | 314 | 0.43  | HOMO-2 → LUMO (40 %)                                                                            |
|                   | 8  |      |     |       | HOMO-1 → LUMO+1 (28 %)                                                                          |
|                   | 20 | 5.02 | 248 | 0.24  | HOMO-1 → LUMO+6 (42 %)<br>HOMO-5→ LUMO (58 %)                                                   |
| <b><i>b</i></b>   | 1  | 2.75 | 450 | 2.83  | HOMO → LUMO (85%)                                                                               |
|                   | 3  | 3.96 | 313 | 0.40  | HOMO-2 → LUMO (40 %)                                                                            |
|                   | 8  | 4.31 | 288 | 0.55  | HOMO-1 → LUMO+5 (24 %)                                                                          |
|                   | 20 | 5.01 | 247 | 0.25  | HOMO-1 → LUMO+6(18 %)<br>HOMO-5→ LUMO (45 %)                                                    |

| <b>Table S5.</b> Experimental and CAM-B3LYP/6-31+G(d) computed fluorescence wavelengths ( $\lambda^{\text{em}}$ , nm) of <b>1a,b</b> and <b>2a,b</b> in toluene. |                            |          |                                  |
|------------------------------------------------------------------------------------------------------------------------------------------------------------------|----------------------------|----------|----------------------------------|
| Compound                                                                                                                                                         | $\lambda^{\text{em}}$ Exp. | Form     | $\lambda^{\text{em-elec}}$ Theo. |
| <b>1a</b>                                                                                                                                                        | 475 (2.61); 507 (2.45)     | <i>a</i> | 530 (2.34)                       |
|                                                                                                                                                                  |                            | <i>b</i> | 535 (2.32)                       |
| <b>1b</b>                                                                                                                                                        | 467 (2.66); 496 (2.50)     | <i>a</i> | 520 (2.38)                       |
|                                                                                                                                                                  |                            | <i>b</i> | 520 (2.38)                       |
|                                                                                                                                                                  |                            | <i>c</i> | 524 (2.37)                       |
|                                                                                                                                                                  |                            | <i>d</i> | 524 (2.37)                       |
| <b>2a</b>                                                                                                                                                        | 485 (2.56); 517 (2.40)     | <i>a</i> | 543 (2.28)                       |
|                                                                                                                                                                  |                            | <i>b</i> | 548 (2.26)                       |
| <b>2b</b>                                                                                                                                                        | 496 (2.50); 520 (2.38)     | <i>a</i> | 542 (2.29)                       |
|                                                                                                                                                                  |                            | <i>b</i> | 542 (2.29)                       |
|                                                                                                                                                                  |                            | <i>c</i> | 540 (2.30)                       |

| <b>Table S6.</b> CAM-B3LYP/6-31+G(d) photo-physical properties of the molecules <b>1a,b</b> and <b>2a,b</b> , including experimental and computed absorption wavelength ( $\lambda^{\text{abs}}$ , nm), fluorescence (vibronic OPE and electronic) wavelengths ( $\lambda^{\text{em}}$ , nm), quantum yield ( $\Phi_{\text{F}}$ ), lifetime ( $\tau$ , ns), and $\Delta\omega$ is the Stokes shift ( $\Delta\omega$ , $\text{cm}^{-1}$ ) in toluene. |                                     |                                    |                |                   |        |                          |                                     |                                         |                                          |                |        |
|------------------------------------------------------------------------------------------------------------------------------------------------------------------------------------------------------------------------------------------------------------------------------------------------------------------------------------------------------------------------------------------------------------------------------------------------------|-------------------------------------|------------------------------------|----------------|-------------------|--------|--------------------------|-------------------------------------|-----------------------------------------|------------------------------------------|----------------|--------|
| Cmpd                                                                                                                                                                                                                                                                                                                                                                                                                                                 | Experimental <sup>a</sup>           |                                    |                |                   |        | Theoretical <sup>b</sup> |                                     |                                         |                                          |                |        |
|                                                                                                                                                                                                                                                                                                                                                                                                                                                      | $\lambda_{\text{max}}^{\text{abs}}$ | $\lambda_{\text{max}}^{\text{em}}$ | $\Delta\omega$ | $\Phi_{\text{F}}$ | $\tau$ | Form                     | $\lambda_{\text{max}}^{\text{abs}}$ | $\lambda_{\text{max}}^{\text{em-elec}}$ | $\lambda_{\text{max}}^{\text{em-vibro}}$ | $\Delta\omega$ | $\tau$ |
| <b>1a</b>                                                                                                                                                                                                                                                                                                                                                                                                                                            | 414                                 | 475, 507                           | 3102           | 0.35              | 0.29   | <i>a</i>                 | 433                                 | 530                                     | 475, 512                                 | 2042           | 1.54   |
|                                                                                                                                                                                                                                                                                                                                                                                                                                                      |                                     |                                    |                |                   |        | <i>b</i>                 | 429                                 | 535                                     | 478, 515                                 | 2389           | 1.54   |
| <b>1b</b>                                                                                                                                                                                                                                                                                                                                                                                                                                            | 413                                 | 467, 496                           | 2800           | 0.28              | 0.27   | <i>a</i>                 | 426                                 | 520                                     | 473, 510                                 | 2446           | 1.68   |
|                                                                                                                                                                                                                                                                                                                                                                                                                                                      |                                     |                                    |                |                   |        | <i>b</i>                 | 423                                 | 520                                     | 470, 498                                 | 2364           | 1.90   |
|                                                                                                                                                                                                                                                                                                                                                                                                                                                      |                                     |                                    |                |                   |        | <i>c</i>                 | 418                                 | 524                                     | 470, 498                                 | 2646           | 1.91   |
|                                                                                                                                                                                                                                                                                                                                                                                                                                                      |                                     |                                    |                |                   |        | <i>d</i>                 | 420                                 | 524                                     | 468, 504                                 | 2442           | 1.69   |
| <b>2a</b>                                                                                                                                                                                                                                                                                                                                                                                                                                            | 438                                 | 485, 517                           | 2212           | 0.34              | 0.56   | <i>a</i>                 | 454                                 | 543                                     | 488, 526                                 | 1534           | 1.64   |
|                                                                                                                                                                                                                                                                                                                                                                                                                                                      |                                     |                                    |                |                   |        | <i>b</i>                 | 450                                 | 548                                     | 485, 523                                 | 1603           | 1.60   |
| <b>2b</b>                                                                                                                                                                                                                                                                                                                                                                                                                                            | 446                                 | 496, 520                           | 2261           | 0.39              | 0.80   | <i>a</i>                 | 455                                 | 542                                     | 493, 532                                 | 1694           | 1.81   |
|                                                                                                                                                                                                                                                                                                                                                                                                                                                      |                                     |                                    |                |                   |        | <i>b</i>                 | 455                                 | 542                                     | 493, 532                                 | 1694           | 1.82   |
|                                                                                                                                                                                                                                                                                                                                                                                                                                                      |                                     |                                    |                |                   |        | <i>c</i>                 | 454                                 | 540                                     | 501, 541                                 | 2066           | 1.82   |

<sup>a</sup>Experimental absorption and fluorescence. <sup>b</sup>Theoretical absorption and fluorescence maxima from wavelengths obtained by using CAM-B3LYP/6-31+G(d) calculations in toluene.

## 5. Vibronic calculations for emissions of 1a,b and 2a,b

As suggested by the structured emissions observed for all compounds, some vibrational modes appear to contribute to the fluorescence decay more than others. The so-called AH approach was used (*vide infra*) to learn more about these particular modes. Note that in order to reach a sufficient spectrum convergence (>90%), normal modes smaller than  $100\text{ cm}^{-1}$  were excluded from the vibronic calculations. These are modes that involve deformations of the two thiophene and phenyl rings, appearing at  $1466$  and  $1502\text{ cm}^{-1}$  for **2b**,  $726$  and  $1522\text{ cm}^{-1}$  for **1b**,  $1081$  and  $1529\text{ cm}^{-1}$  for **1a**, and  $1464$  and  $1500\text{ cm}^{-1}$  for **2a** in the  $S_1$  excited state (Figure S15). According to our simulations, a normal mode with such characteristics occurs at ca.  $1500\text{ cm}^{-1}$  with a moderate shift vector. It corresponds to a mixture of C-C stretching and C-H bending localized on the bithiophene and phenyl rings, consistent with structural changes in the lowest excited state being mostly located on the thiophene rings in **1a,b** and **2a,b**, in line with its assignment as a  $\pi \rightarrow \pi^*$  transition.

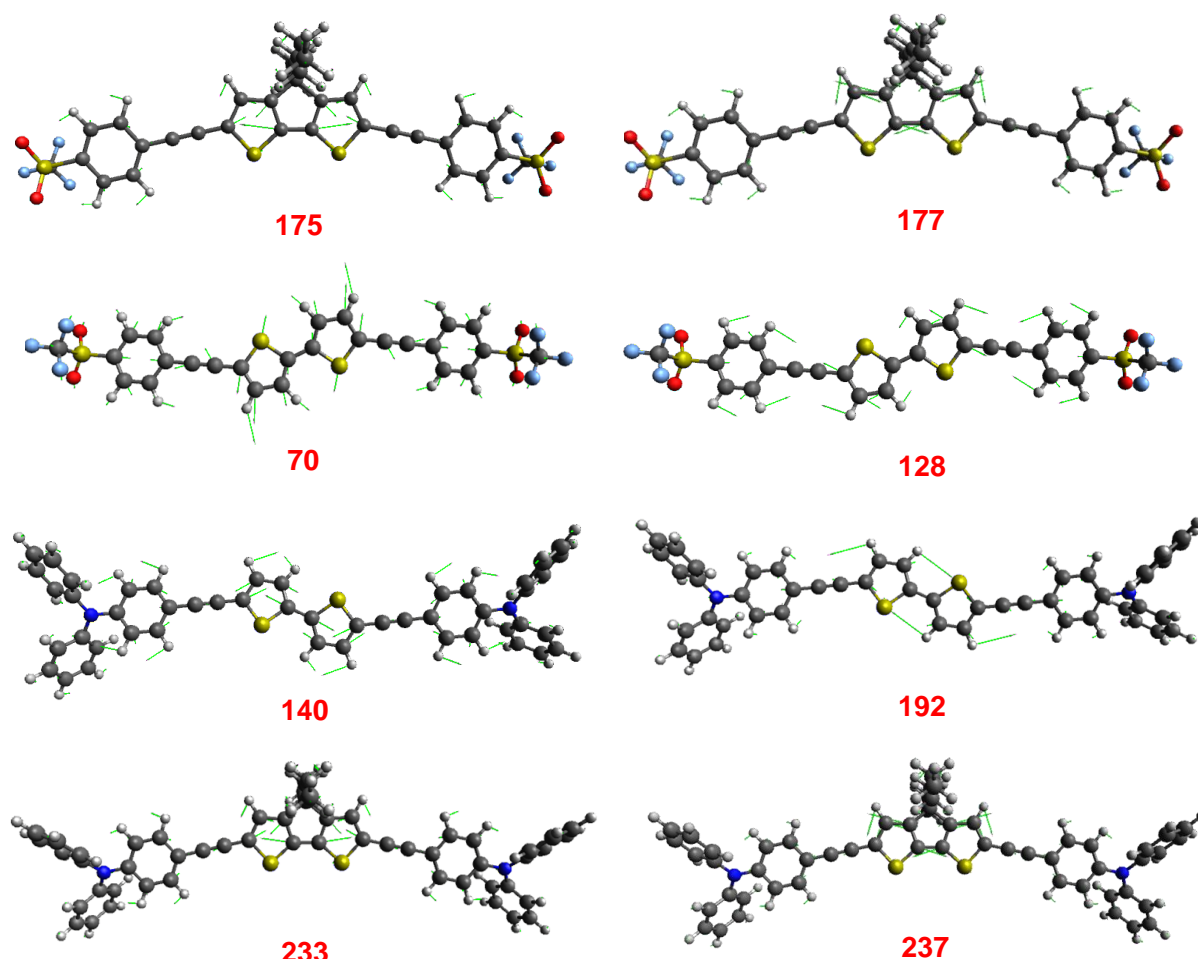

**Figure S15.** Representation of the normal mode eigenvectors with the largest shift-vectors for **2b**, **1b**, **1a** and **2a** during the  $S_1$ - $S_0$  transition in toluene, computed at the CAM-B3LYP/6-31+G(d) level in toluene.

## 6. Calculated spin density in the first triplet ( $T_1$ ) excited state of **1a,b** and **2a,b**

The spin distribution was computed for **1a,b** and **2a,b** to map the localization of unpaired electrons in the  $T_1$  triplet states (Figure S16). For all these molecules, the positive spin density accumulates around the central C=C-S units, adopting a z-shaped distribution in the *trans*-disposed-bithiophene conformers **1a,b** and a u-shaped distribution in **2a,b**, while the negative spin density alternates with positive spin density on the  $\pi$ -manifolds of the peripheral phenylethynyl arms. Interestingly, there is no localization of spin density on the butyl groups, the triflate groups, or the diphenylamino-substituted peripheral phenyls. Calculations indicate that within each family (**1a,b** or **2a,b**), proceeding from the triflate to the diphenylamino-substituted derivative slightly increases the spin density in the  $\pi$ -manifold of the central bithiophene unit and that, for a given terminal substituent, proceeding from a bithiophene-cored to a fused cyclopentadithiophene-cored compound has the same effect. Thus, the maximal spin density in the  $T_1$  state is found for **2b** and decreases in the order: **2b** > **2a**  $\approx$  **1b** > **1a**, while the spin density on the sulfur atom is slightly lower in **2a,b** than in **1a,b** and is independent of the peripheral substituent.

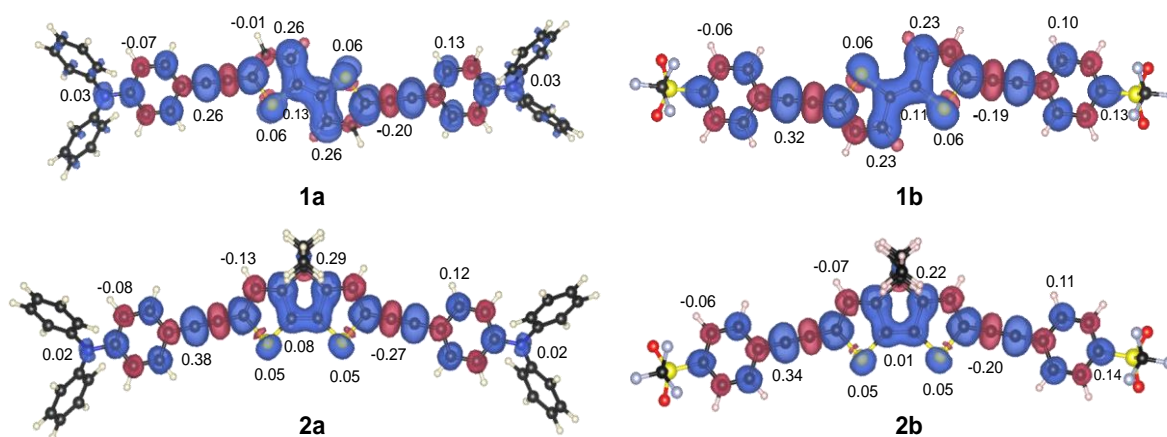

**Figure S16.** 3D map of the spin density, for structures **1a,b** and **2a,b** in their first triplet state computed at the CAM-B3LYP/6-31+G(d) level in toluene. An iso-surface value of  $8 \times 10^{-3}$  electron. $\text{\AA}^{-2}$  was used for this plot. The positive and negative electron spin are represented in blue and pink, respectively. The graphics were created using VESTA software.<sup>1</sup>

<sup>1</sup> Momma, K.; Izumi, F., Ref. AB. *J Appl. Cryst.*, **2008**, *41*, 653-658.

## 7. Calculated one-photon and two-photon absorption using SOAP functionals for 1a,b and 2a,b

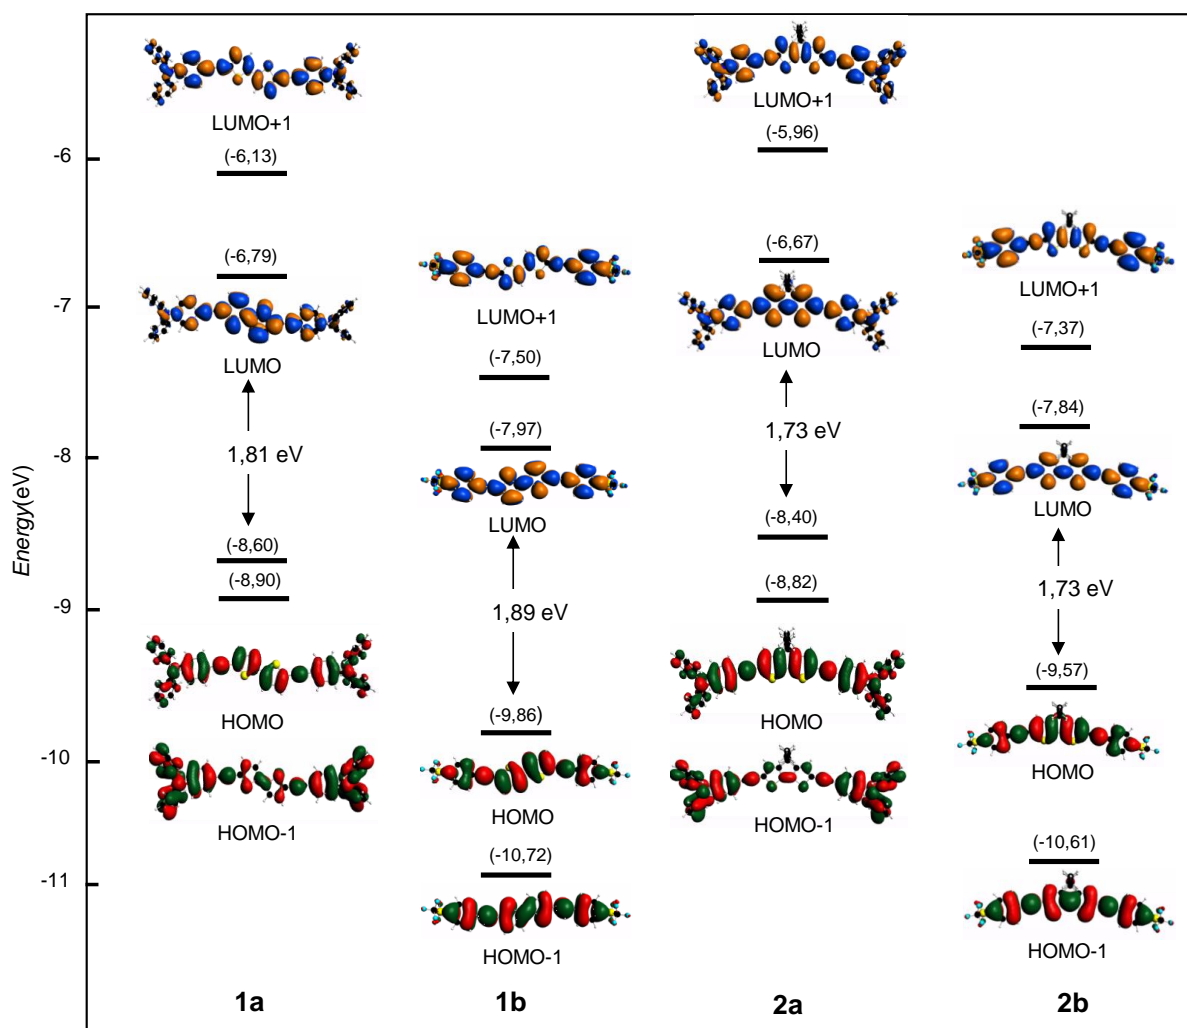

**Figure S17.** SAOP/DZP frontier MO diagrams for **1a,b** and **2a,b**. Contour isodensity values:  $\pm 0.02$  ( $\text{e}/\text{bohr}^3$ )<sup>1/2</sup>. Hydrogen atoms are omitted for clarity.



**Table S7.** Theoretical results of OPA wavelengths (nm), OPA energies (eV) and  $f_{0n}$  calculated at the SAOP/DZP level of theory of molecule **1a** (conformer **a**).

| $S_n$                                                                                                             | 1     | 2                  | 3     | 4                  | 5     | 6                  | 7                  | 8                  | 9                  | 10                 |
|-------------------------------------------------------------------------------------------------------------------|-------|--------------------|-------|--------------------|-------|--------------------|--------------------|--------------------|--------------------|--------------------|
| $\omega^{\text{OPA}}$                                                                                             | 2.07  | 2.22               | 2.75  | 2.78               | 2.87  | 2.89               | 2.90               | 3.02               | 3.03               | 3.22               |
| $\lambda^{\text{OPA}}$                                                                                            | 599   | 559                | 451   | 446                | 432   | 429                | 428                | 410                | 409                | 385                |
| $f_{0n}$                                                                                                          | 1.690 | 0.350<br>$10^{-3}$ | 0.968 | 0.327<br>$10^{-2}$ | 0.175 | 0.120<br>$10^{-2}$ | 0.124<br>$10^{-2}$ | 0.124<br>$10^{-1}$ | 0.124<br>$10^{-1}$ | 0.714<br>$10^{-2}$ |
| Main MO transition percentage<br>$S_1$ : HOMO $\rightarrow$ LUMO (92%)<br>$S_2$ : HOMO-1 $\rightarrow$ LUMO (85%) |       |                    |       |                    |       |                    |                    |                    |                    |                    |

**Table S8.** TPA wavelengths (nm), TPA energies (eV) and  $\sigma_2$  (GM) associated with the different states of molecule **1a** (conformer **a**) calculated at the SAOP/DZP level of theory.

|                        |      |      |      |       |       |      |      |      |      |      |      |      |       |      |
|------------------------|------|------|------|-------|-------|------|------|------|------|------|------|------|-------|------|
| $\omega^{\text{TPA}}$  | 0.97 | 1.00 | 1.03 | 1.1   | 1.12  | 1.18 | 1.24 | 1.3  | 1.4  | 1.5  | 1.61 | 1.68 | 1.72  | 1.77 |
| $\lambda^{\text{TPA}}$ | 1278 | 1240 | 1204 | 1127  | 1107  | 1051 | 1000 | 954  | 886  | 827  | 770  | 740  | 720   | 700  |
| $\sigma_2$             | 793  | 1362 | 2557 | 12514 | 13168 | 5222 | 2470 | 1624 | 1438 | 1275 | 2198 | 7623 | 14514 | 9920 |

**Table S9.** Theoretical results of OPA wavelengths (nm), OPA energies (eV) and  $f_{0n}$  calculated at the SAOP/DZP level of theory of molecule **1b** (conformer **a**).

| $S_n$                                                                                                             | 1     | 2                  | 3     | 4                  | 5     | 6                  | 7                  | 8                  | 9                  | 10                 |
|-------------------------------------------------------------------------------------------------------------------|-------|--------------------|-------|--------------------|-------|--------------------|--------------------|--------------------|--------------------|--------------------|
| $\omega^{\text{OPA}}$                                                                                             | 2.32  | 2.55               | 3.28  | 3.32               | 3.43  | 3.45               | 3.45               | 3.49               | 3.62               | 3.84               |
| $\lambda^{\text{OPA}}$                                                                                            | 534   | 486                | 378   | 446                | 362   | 359                | 359                | 355                | 343                | 323                |
| $f_{0n}$                                                                                                          | 1.826 | 0.174<br>$10^{-3}$ | 0.439 | 0.884<br>$10^{-3}$ | 0.166 | 0.698<br>$10^{-5}$ | 0.893<br>$10^{-3}$ | 0.785<br>$10^{-3}$ | 0.142<br>$10^{-1}$ | 0.259<br>$10^{-2}$ |
| Main MO transition percentage<br>$S_1$ : HOMO $\rightarrow$ LUMO (95%)<br>$S_2$ : HOMO $\rightarrow$ LUMO+1 (73%) |       |                    |       |                    |       |                    |                    |                    |                    |                    |

**Table S10.** TPA wavelengths (nm), TPA energies (eV) and  $\sigma_2$  (GM) associated with the different states of molecule **1b** (conformer **a**). calculated at the SAOP/DZP level of theory.

|                        |      |      |      |      |      |      |      |      |      |      |      |      |      |      |      |
|------------------------|------|------|------|------|------|------|------|------|------|------|------|------|------|------|------|
| $\omega^{\text{TPA}}$  | 1.10 | 1.12 | 1.16 | 1.20 | 1.24 | 1.26 | 1.28 | 1.30 | 1.32 | 1.34 | 1.37 | 1.46 | 1.55 | 1.67 | 1.77 |
| $\lambda^{\text{TPA}}$ | 1127 | 1107 | 1069 | 1033 | 1000 | 984  | 969  | 954  | 939  | 925  | 905  | 850  | 800  | 743  | 700  |
| $\sigma_2$             | 248  | 334  | 66   | 1407 | 3651 | 5567 | 6288 | 5575 | 3942 | 2758 | 1688 | 664  | 412  | 459  | 353  |

| <b>Table S11.</b> Theoretical results of OPA wavelenghts (nm), OPA energies (eV) and $f_{0n}$ calculated at the SAOP/DZP level of theory of molecule <b>2a</b> (conformer <i>a</i> ). |      |                   |      |                    |                    |                    |                    |                    |       |                    |
|---------------------------------------------------------------------------------------------------------------------------------------------------------------------------------------|------|-------------------|------|--------------------|--------------------|--------------------|--------------------|--------------------|-------|--------------------|
| $S_n$                                                                                                                                                                                 | 1    | 2                 | 3    | 4                  | 5                  | 6                  | 7                  | 8                  | 9     | 10                 |
| $\omega^{OPA}$                                                                                                                                                                        | 2.07 | 2.25              | 2.68 | 2.76               | 2.76               | 2.78               | 2.88               | 2.89               | 2.94  | 3.28               |
| $\lambda^{OPA}$                                                                                                                                                                       | 599  | 551               | 463  | 449                | 449                | 446                | 430                | 429                | 422   | 378                |
| $f_{0n}$                                                                                                                                                                              | 2.09 | 0.41<br>$10^{-2}$ | 0.57 | 0.311<br>$10^{-4}$ | 0.201<br>$10^{-2}$ | 0.603<br>$10^{-1}$ | 0.336<br>$10^{-1}$ | 0.250<br>$10^{-1}$ | 0.178 | 0.543<br>$10^{-2}$ |
| Main MO transition percentage<br>$S_1$ : HOMO $\rightarrow$ LUMO (91%)<br>$S_2$ : HOMO-1 $\rightarrow$ LUMO (82%)                                                                     |      |                   |      |                    |                    |                    |                    |                    |       |                    |

| <b>Table S12.</b> TPA wavelenghts (nm), TPA energies (eV) and $\sigma_2$ (GM) associated with the different states of molecule <b>2a</b> (conformer <i>a</i> ) calculated at the SAOP/DZP level of theory. |      |      |      |      |       |      |      |      |      |      |       |
|------------------------------------------------------------------------------------------------------------------------------------------------------------------------------------------------------------|------|------|------|------|-------|------|------|------|------|------|-------|
| $\omega^{TPA}$                                                                                                                                                                                             | 0.95 | 0.99 | 1.03 | 1.08 | 1.13  | 1.18 | 1.24 | 1.34 | 1.45 | 1.64 | 1.77  |
| $\lambda^{TPA}$                                                                                                                                                                                            | 1305 | 1250 | 1204 | 1148 | 1097  | 1051 | 1000 | 925  | 855  | 756  | 700   |
| $\sigma_2$                                                                                                                                                                                                 | 512  | 568  | 1994 | 6273 | 15241 | 7978 | 3357 | 2050 | 1633 | 5852 | 14052 |

| <b>Table S13.</b> Theoretical results of OPA wavelenghts (nm), OPA energies (eV) and $f_{0n}$ calculated at the SAOP/DZP level of theory of molecule <b>2b</b> (conformer <i>a</i> ). |       |                    |       |                    |                    |                    |                    |                    |                    |                    |
|---------------------------------------------------------------------------------------------------------------------------------------------------------------------------------------|-------|--------------------|-------|--------------------|--------------------|--------------------|--------------------|--------------------|--------------------|--------------------|
| $S_n$                                                                                                                                                                                 | 1     | 2                  | 3     | 4                  | 5                  | 6                  | 7                  | 8                  | 9                  | 10                 |
| $\omega^{OPA}$                                                                                                                                                                        | 2.21  | 2.49               | 3.22  | 3.27               | 3.27               | 3.29               | 3.39               | 3.42               | 3.51               | 3.81               |
| $\lambda^{OPA}$                                                                                                                                                                       | 561   | 498                | 385   | 379                | 379                | 377                | 366                | 363                | 353                | 325                |
| $f_{0n}$                                                                                                                                                                              | 2.012 | 0.124<br>$10^{-1}$ | 0.234 | 0.168<br>$10^{-2}$ | 0.133<br>$10^{-3}$ | 0.192<br>$10^{-1}$ | 0.687<br>$10^{-1}$ | 0.129<br>$10^{-1}$ | 0.848<br>$10^{-1}$ | 0.176<br>$10^{-2}$ |
| Main MO transition percentage<br>$S_1$ : HOMO $\rightarrow$ LUMO (96%)<br>$S_2$ : HOMO $\rightarrow$ LUMO+1 (77%)                                                                     |       |                    |       |                    |                    |                    |                    |                    |                    |                    |

| <b>Table S14.</b> TPA wavelenghts (nm), TPA energies (eV) and $\sigma_2$ (GM) associated with the different states of molecule <b>2b</b> (conformer <i>a</i> ) calculated at the SAOP/DZP level of theory. |      |      |      |      |      |      |      |      |      |      |      |     |      |     |
|------------------------------------------------------------------------------------------------------------------------------------------------------------------------------------------------------------|------|------|------|------|------|------|------|------|------|------|------|-----|------|-----|
| $\omega^{TPA}$                                                                                                                                                                                             | 0.99 | 1.03 | 1.08 | 1.1  | 1.18 | 1.21 | 1.24 | 1.28 | 1.3  | 1.37 | 1.46 | 1.5 | 1.63 | 1.7 |
| $\lambda^{TPA}$                                                                                                                                                                                            | 1253 | 1204 | 1150 | 1127 | 1050 | 1025 | 1000 | 969  | 954  | 905  | 849  | 827 | 761  | 729 |
| $\sigma_2$                                                                                                                                                                                                 | 101  | 159  | 315  | 478  | 1882 | 3795 | 6579 | 4275 | 2984 | 1041 | 480  | 391 | 715  | 855 |

**8. Optimized Cartesian coordinates for 1a,b and 2a,b using PBE1PBE/6-31+G(d) in toluene**

1. Table S15: 1a

| <i>a</i> |            |           |           | <i>b</i> |            |           |           |
|----------|------------|-----------|-----------|----------|------------|-----------|-----------|
| atom     | <i>x</i>   | <i>y</i>  | <i>z</i>  | atom     | <i>x</i>   | <i>y</i>  | <i>z</i>  |
| C        | 9.112427   | 0.974545  | -0.377462 | C        | -7.971081  | -1.169301 | -0.074322 |
| C        | 7.735439   | 0.822653  | -0.372311 | C        | -6.756373  | -0.514584 | 0.047974  |
| C        | 7.138616   | -0.355469 | 0.114241  | C        | -6.695079  | 0.889178  | 0.128818  |
| C        | 7.980912   | -1.372435 | 0.601270  | C        | -7.904168  | 1.608319  | 0.087828  |
| C        | 9.357414   | -1.216226 | 0.606918  | C        | -9.119917  | 0.953354  | -0.022585 |
| C        | 9.948541   | -0.040990 | 0.114830  | C        | -9.175570  | -0.447531 | -0.108532 |
| H        | 9.551463   | 1.887408  | -0.769311 | H        | -7.992977  | -2.252656 | -0.147920 |
| H        | 7.105270   | 1.617019  | -0.762438 | H        | -5.834958  | -1.089857 | 0.067003  |
| H        | 7.541708   | -2.286423 | 0.991178  | H        | -7.881809  | 2.692169  | 0.159086  |
| H        | 9.987314   | -2.009402 | 0.999014  | H        | -10.041061 | 1.528506  | -0.039190 |
| C        | 5.729440   | -0.513208 | 0.113198  | C        | -5.450740  | 1.558594  | 0.248250  |
| C        | 4.517973   | -0.656616 | 0.115198  | C        | -4.383279  | 2.140123  | 0.350535  |
| C        | 3.123802   | -0.808495 | 0.112360  | C        | -3.149279  | 2.795651  | 0.471195  |
| S        | 2.087389   | 0.440284  | -0.525913 | S        | -1.661318  | 1.894339  | 0.581115  |
| C        | 0.984011   | -1.689255 | 0.401529  | C        | -1.524032  | 4.461413  | 0.633110  |
| C        | 0.654887   | -0.483497 | -0.188519 | C        | -0.710650  | 3.344555  | 0.674839  |
| C        | -0.979984  | 1.079520  | -1.358259 | C        | 1.548369   | 4.300098  | 1.311090  |
| C        | -0.651815  | 0.032010  | -0.518421 | C        | 0.728672   | 3.312636  | 0.797557  |
| S        | -2.085428  | -0.670123 | 0.167897  | S        | 1.670747   | 1.954938  | 0.263827  |
| C        | -3.120922  | 0.438126  | -0.692670 | C        | 3.163606   | 2.714179  | 0.746970  |
| C        | -4.515427  | 0.373633  | -0.558593 | C        | 4.393601   | 2.062046  | 0.577116  |
| C        | -5.727189  | 0.309395  | -0.433052 | C        | 5.457800   | 1.485908  | 0.423313  |
| C        | -7.136631  | 0.241283  | -0.293784 | C        | 6.698921   | 0.822810  | 0.248055  |
| C        | -7.978220  | 1.116119  | -1.005954 | C        | 7.908536   | 1.439406  | 0.618790  |
| C        | -9.355472  | 1.045594  | -0.874328 | C        | 9.120467   | 0.789194  | 0.452531  |
| C        | -9.947502  | 0.105065  | -0.015226 | C        | 9.173385   | -0.499886 | -0.102742 |
| C        | -9.111405  | -0.766218 | 0.702362  | C        | 7.969316   | -1.117076 | -0.479722 |
| H        | -9.549840  | -1.494849 | 1.377942  | C        | 7.990443   | -2.110497 | -0.918190 |
| C        | -7.734749  | -0.703272 | 0.561175  | C        | 6.756612   | -0.471281 | -0.302259 |
| H        | -9.985393  | 1.722501  | -1.444041 | H        | 10.040249  | 1.279499  | 0.757846  |
| H        | -7.539197  | 1.846541  | -1.679782 | H        | 7.887322   | 2.434057  | 1.055287  |
| H        | -7.104458  | -1.381871 | 1.129132  | H        | 5.836261   | -0.962714 | -0.605179 |
| C        | 2.371075   | -1.873739 | 0.572134  | C        | -2.895275  | 4.154652  | 0.523319  |
| H        | 2.821770   | -2.757980 | 1.008842  | H        | -3.685708  | 4.894988  | 0.468101  |
| C        | -2.367133  | 1.309919  | -1.457211 | C        | 2.917557   | 3.967318  | 1.279177  |
| H        | -2.817112  | 2.081301  | -2.072180 | H        | 3.712097   | 4.608524  | 1.644523  |
| N        | 11.343960  | 0.115051  | 0.115064  | N        | -10.407132 | -1.111283 | -0.225475 |
| N        | -11.342782 | 0.037275  | 0.123065  | N        | 10.402026  | -1.156750 | -0.276729 |
| C        | 12.188209  | -0.996115 | -0.125397 | C        | -11.467937 | -0.529125 | -0.961119 |
| C        | 11.893182  | -1.903657 | -1.150479 | C        | -11.226807 | 0.069114  | -2.204273 |
| C        | 13.334291  | -1.194178 | 0.654415  | C        | -12.773869 | -0.555091 | -0.456499 |
| C        | 12.725685  | -2.994956 | -1.380514 | C        | -12.274074 | 0.640345  | -2.921147 |
| H        | 11.009949  | -1.748947 | -1.764393 | H        | -10.216565 | 0.083355  | -2.604461 |
| C        | 14.170721  | -2.278837 | 0.406808  | C        | -13.818312 | 0.003522  | -1.187555 |
| H        | 13.565919  | -0.493324 | 1.451887  | H        | -12.964788 | -1.016783 | 0.508496  |
| C        | 13.870431  | -3.188077 | -0.607256 | C        | -13.575667 | 0.608478  | -2.420595 |

|   |            |           |           |   |            |           |           |
|---|------------|-----------|-----------|---|------------|-----------|-----------|
| H | 12.483552  | -3.690668 | -2.180142 | H | -12.071254 | 1.100699  | -3.884993 |
| H | 15.056946  | -2.419377 | 1.020739  | H | -14.826925 | -0.024449 | -0.782619 |
| H | 14.522121  | -4.037365 | -0.793877 | H | -14.392210 | 1.049196  | -2.986142 |
| C | -11.983252 | -1.209728 | 0.324610  | C | 10.494149  | -2.559729 | -0.107464 |
| C | -13.005162 | -1.332348 | 1.273977  | C | 11.227676  | -3.333427 | -1.015248 |
| C | -11.611077 | -2.330290 | -0.428488 | C | 9.862567   | -3.188350 | 0.972988  |
| C | -13.645032 | -2.554346 | 1.460092  | C | 11.329866  | -4.710352 | -0.839176 |
| H | -13.295602 | -0.465597 | 1.861521  | H | 11.717736  | -2.849752 | -1.855894 |
| C | -12.244315 | -3.552720 | -0.224236 | C | 9.955744   | -4.567814 | 1.132347  |
| H | -10.824833 | -2.237777 | -1.172946 | H | 9.299702   | -2.591034 | 1.685256  |
| C | -13.266588 | -3.672428 | 0.717217  | C | 10.691789  | -5.336954 | 0.231070  |
| H | -14.436794 | -2.633939 | 2.200920  | H | 11.902784  | -5.297720 | -1.552482 |
| H | -11.944604 | -4.413640 | -0.816717 | H | 9.460028   | -5.041380 | 1.976167  |
| H | -13.763708 | -4.626659 | 0.869309  | H | 10.768098  | -6.412968 | 0.362145  |
| C | -12.127467 | 1.214607  | 0.061106  | C | 11.563156  | -0.424082 | -0.623357 |
| C | -13.322528 | 1.228102  | -0.668510 | C | 12.783668  | -0.696362 | 0.006756  |
| C | -11.724757 | 2.374035  | 0.735621  | C | 11.508029  | 0.572757  | -1.605600 |
| C | -14.100983 | 2.380974  | -0.716091 | C | 13.927605  | 0.013896  | -0.345804 |
| H | -13.637830 | 0.331019  | -1.194474 | H | 12.830325  | -1.467803 | 0.770625  |
| C | -12.500384 | 3.527730  | 0.668989  | C | 12.652865  | 1.289993  | -1.940133 |
| H | -10.802896 | 2.365685  | 1.310986  | H | 10.565273  | 0.781231  | -2.104281 |
| C | -13.693801 | 3.538440  | -0.053040 | C | 13.869577  | 1.013774  | -1.316415 |
| H | -15.026409 | 2.375940  | -1.286707 | H | 14.867944  | -0.209059 | 0.152303  |
| H | -12.174767 | 4.419910  | 1.198177  | H | 12.594319  | 2.060537  | -2.704926 |
| H | -14.300504 | 4.438868  | -0.097274 | H | 14.763056  | 1.570885  | -1.585004 |
| C | 11.922167  | 1.384909  | 0.356400  | C | -10.603566 | -2.370844 | 0.391403  |
| C | 11.432318  | 2.205815  | 1.379966  | C | -10.159160 | -2.598895 | 1.699798  |
| C | 12.998340  | 1.830049  | -0.421133 | C | -11.255114 | -3.400329 | -0.298789 |
| C | 12.003718  | 3.453687  | 1.610680  | C | -10.354635 | -3.839662 | 2.299204  |
| H | 10.603307  | 1.861016  | 1.992160  | H | -9.661022  | -1.800179 | 2.242795  |
| C | 13.575032  | 3.072273  | -0.172755 | C | -11.461620 | -4.632876 | 0.313998  |
| H | 13.380309  | 1.197055  | -1.217504 | H | -11.599859 | -3.227876 | -1.314773 |
| C | 13.079718  | 3.893670  | 0.839769  | C | -11.009369 | -4.862605 | 1.613203  |
| H | 11.612446  | 4.079433  | 2.409050  | H | -10.004137 | -4.001520 | 3.315567  |
| H | 14.409979  | 3.404110  | -0.784965 | H | -11.969016 | -5.422501 | -0.234711 |
| H | 13.527996  | 4.865686  | 1.026958  | H | -11.166350 | -5.828050 | 2.086581  |
| H | 0.241691   | -2.428531 | 0.685960  | H | -1.133026  | 5.473134  | 0.654998  |
| H | -0.236748  | 1.653679  | -1.902692 | H | 1.163145   | 5.226870  | 1.722961  |

2. Table S16: 1b

| <i>a</i> |          |           |           | <i>b</i> |          |           |           |
|----------|----------|-----------|-----------|----------|----------|-----------|-----------|
| atom     | <i>x</i> | <i>y</i>  | <i>z</i>  | atom     | <i>x</i> | <i>y</i>  | <i>z</i>  |
| C        | 9.093841 | -1.044371 | -0.574695 | C        | 8.012712 | -1.358645 | -0.886167 |
| C        | 7.716321 | -0.913160 | -0.496435 | C        | 6.787662 | -0.729096 | -0.731178 |
| C        | 7.129650 | 0.358020  | -0.339994 | C        | 6.720860 | 0.585821  | -0.230143 |
| C        | 7.953347 | 1.498532  | -0.267003 | C        | 7.910125 | 1.260884  | 0.108381  |
| C        | 9.331491 | 1.373769  | -0.344836 | C        | 9.138110 | 0.636985  | -0.045013 |
| C        | 9.887176 | 0.101827  | -0.495746 | C        | 9.175596 | -0.668560 | -0.538584 |
| H        | 9.552594 | -2.019337 | -0.707571 | H        | 8.072703 | -2.367605 | -1.282516 |

|          |            |           |           |          |            |           |           |
|----------|------------|-----------|-----------|----------|------------|-----------|-----------|
| H        | 7.081234   | -1.791016 | -0.561044 | H        | 5.872091   | -1.246191 | -1.000393 |
| H        | 7.500877   | 2.478746  | -0.154954 | H        | 7.859429   | 2.277234  | 0.485911  |
| H        | 9.972017   | 2.249322  | -0.301959 | H        | 10.059488  | 1.155491  | 0.201828  |
| C        | 5.720772   | 0.488651  | -0.263140 | C        | 5.466958   | 1.227062  | -0.073197 |
| C        | 4.509620   | 0.608585  | -0.195673 | C        | 4.392328   | 1.785054  | 0.066666  |
| C        | 3.116319   | 0.733347  | -0.121514 | C        | 3.152163   | 2.417796  | 0.221729  |
| C        | 2.366885   | 1.885890  | 0.037169  | C        | 2.892798   | 3.683466  | 0.718896  |
| S        | 2.082461   | -0.663656 | -0.234493 | S        | 1.672297   | 1.620964  | -0.232838 |
| C        | 0.981567   | 1.642088  | 0.075950  | C        | 1.521380   | 3.996834  | 0.745461  |
| C        | 0.654522   | 0.303744  | -0.052954 | C        | 0.716872   | 2.979166  | 0.263652  |
| C        | -0.654521  | -0.303800 | -0.053123 | C        | -1.548270  | 4.098733  | 0.094894  |
| C        | -3.116324  | -0.733355 | -0.121905 | C        | -0.723535  | 2.988776  | 0.148123  |
| C        | -4.509618  | -0.608503 | -0.196006 | S        | -1.652037  | 1.527166  | 0.074459  |
| C        | -5.720763  | -0.488471 | -0.263442 | C        | -2.913525  | 3.774564  | -0.008653 |
| C        | -7.129633  | -0.357719 | -0.340226 | C        | -3.147829  | 2.410624  | -0.042579 |
| C        | -7.716216  | 0.913593  | -0.495902 | C        | -4.375123  | 1.744071  | -0.151748 |
| C        | -9.093732  | 1.044948  | -0.574065 | C        | -5.437824  | 1.154540  | -0.245911 |
| C        | -9.887143  | -0.101242 | -0.495824 | C        | -6.677362  | 0.476799  | -0.356858 |
| C        | -9.331543  | -1.373317 | -0.345698 | C        | -7.881054  | 1.205533  | -0.424523 |
| H        | -9.972112  | -2.248865 | -0.303380 | C        | -9.094655  | 0.545489  | -0.535791 |
| C        | -7.953411  | -1.498220 | -0.267921 | C        | -9.103160  | -0.849991 | -0.579281 |
| H        | -9.552432  | 2.020022  | -0.706322 | C        | -7.924753  | -1.596378 | -0.518312 |
| H        | -7.081071  | 1.791446  | -0.559984 | H        | -7.959817  | -2.680241 | -0.570177 |
| H        | -7.501007  | -2.478531 | -0.156456 | C        | -6.714265  | -0.930587 | -0.406776 |
| S        | 11.642953  | -0.061139 | -0.596595 | H        | -10.025344 | 1.100668  | -0.600996 |
| O        | 11.983879  | -1.322539 | -1.244855 | H        | -7.852018  | 2.290094  | -0.394540 |
| O        | 12.232571  | 1.209223  | -1.004171 | H        | -5.786350  | -1.491975 | -0.363146 |
| O        | -11.983697 | 1.324105  | -1.243435 | S        | 10.738687  | -1.467609 | -0.732061 |
| O        | -12.232594 | -1.207916 | -1.005664 | O        | 10.617192  | -2.561895 | -1.688766 |
| S        | -11.642905 | 0.061936  | -0.596601 | O        | 11.795595  | -0.466396 | -0.822608 |
| C        | -12.153541 | 0.280678  | 1.194490  | O        | -11.654442 | -0.789376 | -1.266471 |
| C        | 12.153473  | -0.281909 | 1.194287  | O        | -10.430147 | -3.032383 | -1.259909 |
| F        | -13.472205 | 0.417469  | 1.246734  | S        | -10.648035 | -1.694144 | -0.722141 |
| F        | -11.576267 | 1.364938  | 1.706884  | C        | -11.153290 | -1.964845 | 1.063376  |
| F        | -11.791088 | -0.782511 | 1.908359  | C        | 10.999698  | -2.299847 | 0.928145  |
| F        | 11.576303  | -1.366852 | 1.705358  | F        | -12.317885 | -2.600240 | 1.083165  |
| F        | 11.790816  | 0.780388  | 1.909372  | F        | -11.277176 | -0.796071 | 1.687887  |
| F        | 13.472151  | -0.418586 | 1.246487  | F        | -10.238826 | -2.698657 | 1.693076  |
| H        | 2.819520   | 2.866845  | 0.128225  | F        | 10.017830  | -3.165870 | 1.167062  |
| H        | 0.239129   | 2.422220  | 0.210798  | F        | 11.021803  | -1.390080 | 1.899393  |
| S        | -2.082460  | 0.663714  | -0.234066 | F        | 12.159070  | -2.944499 | 0.902273  |
| C        | -0.981571  | -1.642217 | 0.074983  | H        | -3.713728  | 4.503576  | -0.071016 |
| C        | -2.366889  | -1.885997 | 0.036071  | H        | 3.679910   | 4.346085  | 1.061007  |
| H        | -0.239133  | -2.422430 | 0.209359  | H        | 1.123484   | 4.929691  | 1.129793  |
| H        | -2.819521  | -2.867006 | 0.126558  | H        | -1.169045  | 5.114780  | 0.104195  |
| <i>c</i> |            |           |           | <i>d</i> |            |           |           |
| atom     | <i>x</i>   | <i>y</i>  | <i>z</i>  | atom     | <i>x</i>   | <i>y</i>  | <i>z</i>  |
| C        | 7.976411   | -1.657948 | 0.255427  | C        | -9.097330  | -1.070243 | -0.532264 |
| C        | 6.758647   | -0.997891 | 0.206255  | C        | -7.718666  | -0.930734 | -0.505072 |
| C        | 6.684423   | 0.381448  | 0.482820  | C        | -7.133666  | 0.347977  | -0.420745 |
| C        | 7.857713   | 1.086976  | 0.814750  | C        | -7.960351  | 1.487417  | -0.367129 |
| C        | 9.078307   | 0.432450  | 0.865923  | C        | -9.339658  | 1.354403  | -0.394385 |

|   |            |           |           |   |            |           |           |
|---|------------|-----------|-----------|---|------------|-----------|-----------|
| C | 9.124442   | -0.933936 | 0.582860  | C | -9.893488  | 0.075233  | -0.474458 |
| H | 8.039689   | -2.723095 | 0.055024  | H | -9.555269  | -2.051562 | -0.609561 |
| H | 5.853439   | -1.543300 | -0.041241 | H | -7.081616  | -1.808158 | -0.554218 |
| H | 7.799394   | 2.147896  | 1.036332  | H | -7.509480  | 2.473112  | -0.310341 |
| H | 9.984770   | 0.966757  | 1.133344  | H | -9.982792  | 2.228668  | -0.366608 |
| C | 5.437501   | 1.052982  | 0.433153  | C | -5.723637  | 0.486892  | -0.397009 |
| C | 4.368558   | 1.637257  | 0.392186  | C | -4.511517  | 0.614090  | -0.378321 |
| C | 3.134497   | 2.298444  | 0.340967  | C | -3.117103  | 0.747335  | -0.356806 |
| C | 2.868851   | 3.636133  | 0.578260  | C | -2.369249  | 1.909380  | -0.282096 |
| S | 1.672453   | 1.443810  | -0.063742 | S | -2.079930  | -0.650110 | -0.424669 |
| C | 1.505546   | 3.960360  | 0.450056  | C | -0.981801  | 1.674036  | -0.290752 |
| C | 0.714554   | 2.877962  | 0.107709  | C | -0.652227  | 0.332733  | -0.371468 |
| C | -1.505590  | 3.960574  | -0.449397 | C | 0.659767   | -0.267852 | -0.410432 |
| C | -0.714588  | 2.878013  | -0.107592 | C | 3.115083   | -0.713680 | -0.267926 |
| S | -1.672465  | 1.443749  | 0.063062  | C | 4.499239   | -0.615203 | -0.075617 |
| C | -2.868907  | 3.636417  | -0.577673 | C | 5.702377   | -0.521107 | 0.095766  |
| C | -3.134569  | 2.298642  | -0.340896 | C | 7.102602   | -0.421295 | 0.289242  |
| C | -4.368646  | 1.637493  | -0.392218 | C | 7.669576   | 0.777218  | 0.765210  |
| C | -5.437608  | 1.053257  | -0.433248 | C | 9.038701   | 0.877300  | 0.956196  |
| C | -6.684532  | 0.381725  | -0.482884 | C | 9.843279   | -0.227119 | 0.669414  |
| C | -7.857891  | 1.087328  | -0.814403 | C | 9.306778   | -1.428268 | 0.201574  |
| C | -9.078485  | 0.432796  | -0.865554 | H | 9.954728   | -2.276285 | 0.002103  |
| C | -9.124544  | -0.933678 | -0.582910 | S | 7.937042   | -1.522061 | 0.012295  |
| C | -7.976441  | -1.657765 | -0.255887 | H | 9.481734   | 1.793516  | 1.334374  |
| H | -8.039656  | -2.722979 | -0.055813 | H | 7.025741   | 1.622469  | 0.986977  |
| C | -6.758686  | -0.997696 | -0.206705 | H | 7.498949   | -2.448187 | -0.346154 |
| H | -9.985007  | 0.967162  | -1.132658 | S | -11.650775 | -0.098865 | -0.510365 |
| H | -7.799630  | 2.148314  | -1.035691 | O | -12.260270 | 1.149587  | -0.954794 |
| H | -5.853428  | -1.543164 | 0.040476  | O | -12.005396 | -1.389403 | -1.090361 |
| S | 10.678380  | -1.771007 | 0.645548  | O | 11.880507  | 0.983090  | 1.839756  |
| O | 10.459979  | -3.201077 | 0.831940  | O | 12.160139  | -1.436181 | 1.065607  |
| O | 11.613903  | -1.011388 | 1.467431  | S | 11.588447  | -0.103153 | 0.911114  |
| O | -11.614190 | -1.010774 | -1.466954 | C | 12.207405  | 0.500074  | -0.753156 |
| O | -10.460109 | -3.200735 | -0.832710 | C | -12.102487 | -0.240668 | 1.304215  |
| S | -10.678479 | -1.770752 | -0.645618 | F | 13.526203  | 0.632508  | -0.692971 |
| S | -11.323468 | -1.602938 | 1.107285  | F | 11.658400  | 1.675751  | -1.048987 |
| F | -12.503608 | -2.204254 | 1.184960  | F | 11.894349  | -0.376633 | -1.704380 |
| F | -11.460855 | -0.317764 | 1.424915  | F | -11.720257 | 0.853124  | 1.959133  |
| F | -10.479434 | -2.173791 | 1.963403  | F | -11.505992 | -1.300729 | 1.844291  |
| C | 11.323754  | -1.602391 | -1.107133 | F | -13.418397 | -0.376905 | 1.404721  |
| F | 11.461349  | -0.317083 | -1.424115 | H | -2.824086  | 2.892293  | -0.232594 |
| F | 12.503846  | -2.203800 | -1.184852 | H | -0.238703  | 2.464479  | -0.259873 |
| F | 10.479830  | -2.172738 | -1.963696 | S | 2.061392   | 0.629357  | 0.077147  |
| H | 3.644578   | 4.343911  | 0.848382  | C | 1.008065   | -1.547596 | -0.804357 |
| H | -3.644649  | 4.344341  | -0.847373 | C | 2.390115   | -1.800476 | -0.724576 |
| H | -1.101450  | 4.951134  | -0.627656 | H | 0.284585   | -2.274005 | -1.160378 |
| H | 1.101396   | 4.950832  | 0.628781  | H | 2.858376   | -2.739513 | -0.997349 |

3. Table S17: 2a

| <i>a</i> |            |           |           | <i>b</i> |            |           |           |
|----------|------------|-----------|-----------|----------|------------|-----------|-----------|
| atom     | <i>x</i>   | <i>y</i>  | <i>z</i>  | atom     | <i>x</i>   | <i>y</i>  | <i>z</i>  |
| C        | 8.945253   | 1.648760  | -0.825534 | C        | -8.916663  | -2.067657 | -0.383965 |
| C        | 7.590234   | 1.397585  | -0.682180 | C        | -7.565053  | -1.771036 | -0.314385 |
| C        | 7.133089   | 0.203458  | -0.093390 | C        | -7.123423  | -0.459271 | -0.057876 |
| C        | 8.093305   | -0.724824 | 0.351471  | C        | -8.095553  | 0.540740  | 0.132957  |
| C        | 9.448336   | -0.468076 | 0.219206  | C        | -9.447178  | 0.241570  | 0.075987  |
| C        | 9.898898   | 0.721884  | -0.374726 | C        | -9.882243  | -1.067343 | -0.187169 |
| H        | 9.274643   | 2.571489  | -1.294414 | H        | -9.234037  | -3.084590 | -0.595878 |
| H        | 6.867459   | 2.124491  | -1.042085 | H        | -6.832844  | -2.557499 | -0.474636 |
| H        | 7.764082   | -1.648984 | 0.818264  | H        | -7.778357  | 1.558536  | 0.342332  |
| H        | 10.171316  | -1.193515 | 0.580884  | H        | -10.179528 | 1.027051  | 0.238745  |
| C        | 5.746667   | -0.057427 | 0.046761  | C        | -5.740183  | -0.154877 | 0.005260  |
| C        | 4.554923   | -0.290804 | 0.170817  | C        | -4.550708  | 0.113791  | 0.059313  |
| C        | 3.184302   | -0.548391 | 0.305648  | C        | -3.181600  | 0.406052  | 0.118878  |
| S        | 2.001099   | 0.613458  | -0.278769 | S        | -1.992472  | -0.858423 | -0.154750 |
| C        | 1.165837   | -1.571970 | 0.826426  | C        | -1.167363  | 1.550036  | 0.329683  |
| C        | 0.716980   | -0.399886 | 0.235109  | C        | -0.715901  | 0.263428  | 0.068510  |
| C        | -0.000015  | -2.440610 | 1.265467  | C        | 1.167825   | 1.535908  | 0.389501  |
| C        | -1.165843  | -1.571929 | 0.826452  | C        | 0.714706   | 0.254779  | 0.105040  |
| C        | -0.716956  | -0.399859 | 0.235130  | S        | 1.989730   | -0.861870 | -0.151007 |
| S        | -2.001050  | 0.613558  | -0.278671 | C        | 3.180468   | 0.403497  | 0.111027  |
| C        | -3.184283  | -0.548257 | 0.305750  | C        | 4.549313   | 0.112756  | 0.039145  |
| C        | -4.554901  | -0.290629 | 0.170948  | C        | 5.738789   | -0.152221 | -0.030720 |
| C        | -5.746644  | -0.057216 | 0.046945  | C        | 7.122205   | -0.451713 | -0.111221 |
| C        | -7.133069  | 0.203644  | -0.093210 | C        | 8.093000   | 0.550260  | 0.076126  |
| C        | -7.590242  | 1.397598  | -0.682327 | C        | 9.444907   | 0.256335  | 0.001281  |
| C        | -8.945269  | 1.648723  | -0.825710 | C        | 9.881375   | -1.049068 | -0.276422 |
| C        | -9.898895  | 0.721966  | -0.374609 | C        | 8.917101   | -2.051341 | -0.469475 |
| C        | -9.448305  | -0.467821 | 0.219650  | H        | 9.235607   | -3.065562 | -0.692434 |
| H        | -10.171267 | -1.193168 | 0.581548  | C        | 7.565335   | -1.759962 | -0.382622 |
| C        | -8.093267  | -0.724517 | 0.351950  | H        | 10.176403  | 1.043172  | 0.161336  |
| H        | -9.274680  | 2.571309  | -1.294856 | H        | 7.774701   | 1.565360  | 0.296621  |
| H        | -6.867484  | 2.124399  | -1.042482 | H        | 6.834043   | -2.547715 | -0.540711 |
| H        | -7.764021  | -1.648546 | 0.818987  | C        | -2.571822  | 1.628560  | 0.370870  |
| C        | -0.000006  | -2.676252 | 2.793633  | C        | 2.572387   | 1.623054  | 0.380775  |
| C        | 0.000050   | -1.423184 | 3.662877  | H        | 3.155948   | 2.520450  | 0.554129  |
| H        | 0.879436   | -3.289834 | 3.037610  | N        | -11.253117 | -1.368991 | -0.252321 |
| H        | -0.879486  | -3.289773 | 3.037629  | N        | 11.252501  | -1.345430 | -0.359502 |
| C        | 0.000020   | -1.747077 | 5.154816  | C        | -12.163830 | -0.437353 | -0.805937 |
| H        | 0.879696   | -0.808738 | 3.426073  | C        | -11.847684 | 0.251683  | -1.983721 |
| C        | 0.000096   | -0.499854 | 6.031413  | C        | -13.396829 | -0.200183 | -0.185641 |
| H        | -0.878955  | -2.363307 | 5.393510  | C        | -12.746222 | 1.168286  | -2.521656 |
| H        | 0.878912   | -2.363421 | 5.393520  | H        | -10.895970 | 0.064830  | -2.473839 |
| H        | 0.000071   | -0.757666 | 7.096779  | C        | -14.296806 | 0.705683  | -0.739492 |
| H        | 0.884923   | 0.119035  | 5.837669  | H        | -13.645488 | -0.730786 | 0.729468  |
| H        | -0.884644  | 0.119153  | 5.837655  | C        | -13.976802 | 1.398881  | -1.906726 |
| C        | -0.000036  | -3.810467 | 0.548428  | H        | -12.486316 | 1.694781  | -3.436725 |
| C        | -0.000068  | -3.766614 | -0.975998 | H        | -15.250073 | 0.878818  | -0.246123 |
| C        | -0.000131  | -5.159857 | -1.600241 | H        | -14.679056 | 2.110080  | -2.333172 |
| C        | -0.000157  | -5.125852 | -3.124317 | C        | 11.745021  | -2.585980 | 0.111880  |

|   |            |           |           |   |            |           |           |
|---|------------|-----------|-----------|---|------------|-----------|-----------|
| H | 0.878787   | -5.717594 | -1.245633 | C | 12.697120  | -3.296432 | -0.629812 |
| H | -0.879077  | -5.717531 | -1.245600 | C | 11.293098  | -3.114198 | 1.327866  |
| H | -0.000202  | -6.136496 | -3.548679 | C | 13.190067  | -4.509479 | -0.157791 |
| H | -0.884926  | -4.602683 | -3.507645 | H | 13.048848  | -2.891884 | -1.575012 |
| H | 0.884639   | -4.602749 | -3.507675 | C | 11.778656  | -4.335989 | 1.784351  |
| H | -0.879527  | -0.808645 | 3.426057  | H | 10.560702  | -2.562998 | 1.911531  |
| H | -0.879640  | -3.211324 | -1.330152 | C | 12.731825  | -5.039609 | 1.048122  |
| H | 0.879532   | -3.211393 | -1.330189 | H | 13.928733  | -5.049089 | -0.745400 |
| H | -0.879566  | -4.370850 | 0.897470  | H | 11.417995  | -4.732637 | 2.730221  |
| H | 0.879508   | -4.370852 | 0.897430  | H | 13.113899  | -5.990060 | 1.410701  |
| C | 2.567290   | -1.659442 | 0.868138  | C | 12.153208  | -0.407099 | -0.918103 |
| H | 3.139481   | -2.482830 | 1.282805  | C | 13.392672  | -0.169102 | -0.311131 |
| C | -2.567299  | -1.659344 | 0.868204  | C | 11.820424  | 0.288086  | -2.087672 |
| H | -3.139511  | -2.482715 | 1.282877  | C | 14.282542  | 0.743654  | -0.869982 |
| N | 11.273248  | 0.978867  | -0.514771 | H | 13.654288  | -0.704427 | 0.597591  |
| N | -11.273249 | 0.978879  | -0.514730 | C | 12.709001  | 1.211482  | -2.630507 |
| C | 12.170927  | -0.076638 | -0.804733 | H | 10.863621  | 0.100685  | -2.567567 |
| C | 11.844547  | -1.043492 | -1.764166 | C | 13.945983  | 1.442947  | -2.028894 |
| C | 13.400822  | -0.161355 | -0.140299 | H | 15.240997  | 0.917344  | -0.386964 |
| C | 12.729774  | -2.080645 | -2.042710 | H | 12.436154  | 1.742713  | -3.539049 |
| H | 10.895286  | -0.977336 | -2.288979 | H | 14.640391  | 2.159503  | -2.459203 |
| C | 14.287721  | -1.192207 | -0.437109 | C | -11.735666 | -2.608810 | 0.231252  |
| H | 13.657399  | 0.585200  | 0.606433  | C | -11.268718 | -3.128437 | 1.445253  |
| C | 13.957337  | -2.160395 | -1.385126 | C | -12.692843 | -3.327033 | -0.496262 |
| H | 12.462030  | -2.823185 | -2.790401 | C | -11.744605 | -4.349511 | 1.913675  |
| H | 15.238727  | -1.244264 | 0.087270  | H | -10.532281 | -2.571141 | 2.017947  |
| H | 14.649301  | -2.967533 | -1.609945 | C | -13.175986 | -4.539317 | -0.012294 |
| C | -12.170894 | -0.076724 | -0.804428 | H | -13.056210 | -2.929104 | -1.439866 |
| C | -13.400826 | -0.161275 | -0.140045 | C | -12.702816 | -5.060894 | 1.191582  |
| C | -11.844432 | -1.043849 | -1.763560 | H | -11.372321 | -4.739473 | 2.857818  |
| C | -14.287684 | -1.192231 | -0.436613 | H | -13.918764 | -5.085069 | -0.588941 |
| H | -13.657466 | 0.585493  | 0.606453  | H | -13.077248 | -6.010768 | 1.563528  |
| C | -12.729617 | -2.081103 | -2.041858 | C | 0.000760   | 2.499351  | 0.562800  |
| H | -10.895141 | -0.977823 | -2.288334 | C | 0.097143   | 3.598986  | -0.522264 |
| C | -13.957220 | -2.160688 | -1.384329 | C | -1.011631  | 4.646244  | -0.529226 |
| H | -15.238721 | -1.244156 | 0.087722  | H | 0.129489   | 3.099896  | -1.500218 |
| H | -12.461810 | -2.823853 | -2.789318 | H | 1.066134   | 4.104344  | -0.408968 |
| H | -14.649153 | -2.967907 | -1.608958 | C | -0.818133  | 5.682742  | -1.634167 |
| C | -11.772912 | 2.295076  | -0.367332 | H | -1.986172  | 4.158575  | -0.666753 |
| C | -12.740037 | 2.787333  | -1.252600 | H | -1.054529  | 5.163542  | 0.439780  |
| C | -11.313303 | 3.117784  | 0.668930  | C | -1.918754  | 6.737075  | -1.659123 |
| C | -13.239883 | 4.077047  | -1.097445 | H | 0.157767   | 6.172391  | -1.504623 |
| H | -13.098003 | 2.153661  | -2.059508 | H | -0.776421  | 5.171186  | -2.606129 |
| C | -11.805891 | 4.412100  | 0.806632  | H | -1.755702  | 7.467842  | -2.459476 |
| H | -10.569350 | 2.737834  | 1.363957  | H | -2.901994  | 6.278612  | -1.822259 |
| C | -12.773851 | 4.899190  | -0.071675 | H | -1.962810  | 7.286464  | -0.710375 |
| H | -13.990265 | 4.444753  | -1.793007 | C | -0.094826  | 3.064079  | 2.000724  |
| H | -11.438989 | 5.038324  | 1.616141  | C | 1.015292   | 4.017225  | 2.431068  |
| H | -13.161283 | 5.907968  | 0.042634  | H | -0.127758  | 2.211212  | 2.692137  |
| C | 11.772889  | 2.295027  | -0.366986 | H | -1.063452  | 3.572729  | 2.102297  |
| C | 11.313175  | 3.117471  | 0.669439  | C | 0.824552   | 4.515992  | 3.862002  |
| C | 12.740073  | 2.787526  | -1.252055 | H | 1.989206   | 3.514725  | 2.357130  |
| C | 11.805719  | 4.411765  | 0.807498  | H | 1.058165   | 4.883474  | 1.755656  |
| H | 10.569173  | 2.737335  | 1.364310  | C | 1.926512   | 5.468849  | 4.310704  |
| C | 13.239878  | 4.077212  | -1.096540 | H | -0.150930  | 5.016619  | 3.944108  |



|   |           |          |           |   |           |          |          |
|---|-----------|----------|-----------|---|-----------|----------|----------|
| H | 13.098113 | 2.154066 | -2.059096 | H | 0.783600  | 3.653981 | 4.542733 |
| C | 12.773741 | 4.899094 | -0.070608 | H | 1.765649  | 5.811894 | 5.339108 |
| H | 11.438733 | 5.037782 | 1.617128  | H | 2.909434  | 4.983143 | 4.271776 |
| H | 13.990306 | 4.445107 | -1.791953 | H | 1.969762  | 6.356032 | 3.666553 |
| H | 13.161137 | 5.907854 | 0.043980  | H | -3.153778 | 2.519898 | 0.577683 |

4. Table S18: 2b

| <i>a</i> |            |           |           | <i>b</i> |            |           |           |
|----------|------------|-----------|-----------|----------|------------|-----------|-----------|
| atom     | <i>x</i>   | <i>y</i>  | <i>z</i>  | atom     | <i>x</i>   | <i>y</i>  | <i>z</i>  |
| C        | 8.915369   | -1.626435 | -1.326036 | C        | -8.891497  | -2.078442 | -0.554665 |
| C        | 7.560929   | -1.372107 | -1.181509 | C        | -7.540661  | -1.782168 | -0.467845 |
| C        | 7.120075   | -0.217028 | -0.504755 | C        | -7.104203  | -0.442205 | -0.443699 |
| C        | 8.069481   | 0.682200  | 0.021288  | C        | -8.054027  | 0.596890  | -0.512612 |
| C        | 9.425118   | 0.433146  | -0.120085 | C        | -9.406046  | 0.306762  | -0.599972 |
| C        | 9.834444   | -0.721203 | -0.791119 | C        | -9.811385  | -1.029554 | -0.617963 |
| H        | 9.261356   | -2.508171 | -1.856657 | H        | -9.233416  | -3.108430 | -0.585672 |
| H        | 6.830844   | -2.060851 | -1.594685 | H        | -6.809620  | -2.583282 | -0.423338 |
| H        | 7.731270   | 1.576457  | 0.535129  | H        | -7.718392  | 1.629038  | -0.502451 |
| H        | 10.161593  | 1.127423  | 0.272762  | H        | -10.141797 | 1.102422  | -0.665842 |
| C        | 5.735680   | 0.040670  | -0.359598 | C        | -5.723290  | -0.142835 | -0.357455 |
| C        | 4.544322   | 0.269898  | -0.229812 | C        | -4.534663  | 0.122608  | -0.283783 |
| C        | 3.175597   | 0.520297  | -0.087673 | C        | -3.168845  | 0.411965  | -0.198962 |
| C        | 2.563005   | 1.604497  | 0.532382  | C        | -2.558468  | 1.661529  | -0.161838 |
| S        | 1.994395   | -0.607448 | -0.733814 | S        | -1.989067  | -0.886975 | -0.124056 |
| C        | 1.164109   | 1.522677  | 0.484943  | C        | -1.162013  | 1.568061  | -0.074331 |
| C        | 0.716286   | 0.380905  | -0.168715 | C        | -0.714724  | 0.252598  | -0.045249 |
| C        | 0.000039   | 2.368442  | 0.968585  | C        | 0.000014   | 2.542397  | -0.000090 |
| C        | -1.164043  | 1.522567  | 0.485166  | C        | 1.162045   | 1.568074  | 0.074269  |
| C        | -0.716243  | 0.380857  | -0.168615 | C        | 0.714757   | 0.252606  | 0.045436  |
| S        | -1.994374  | -0.607511 | -0.733651 | S        | 1.989104   | -0.886950 | 0.124425  |
| C        | -2.562935  | 1.604250  | 0.532892  | C        | 2.558501   | 1.661562  | 0.161731  |
| C        | -3.175552  | 0.520078  | -0.087182 | C        | 3.168880   | 0.412005  | 0.199085  |
| C        | -4.544289  | 0.269396  | -0.228709 | C        | 4.534701   | 0.122668  | 0.283925  |
| C        | -5.735719  | 0.040494  | -0.358424 | C        | 5.723332   | -0.142763 | 0.357565  |
| C        | -7.120103  | -0.217014 | -0.504032 | C        | 7.104249   | -0.442125 | 0.443765  |
| C        | -8.069541  | 0.682061  | 0.022218  | C        | 8.054077   | 0.596979  | 0.512483  |
| C        | -9.425169  | 0.433094  | -0.119389 | C        | 9.406100   | 0.306862  | 0.599812  |
| C        | -9.834454  | -0.721017 | -0.790857 | C        | 9.811438   | -1.029453 | 0.617974  |
| C        | -8.915346  | -1.626090 | -1.325987 | C        | 8.891545   | -2.078349 | 0.554880  |
| H        | -9.261302  | -2.507650 | -1.856923 | H        | 9.233464   | -3.108332 | 0.586025  |
| C        | -7.560915  | -1.371850 | -1.181227 | C        | 7.540705   | -1.782086 | 0.468092  |
| H        | -10.161669 | 1.127244  | 0.273638  | H        | 10.141858  | 1.102527  | 0.665523  |
| H        | -7.731357  | 1.576102  | 0.536453  | H        | 7.718442   | 1.629126  | 0.502192  |
| H        | -6.830803  | -2.060498 | -1.594514 | H        | 6.809658   | -2.583203 | 0.423747  |
| S        | 11.560467  | -1.043330 | -0.968547 | S        | -11.532914 | -1.402477 | -0.727487 |
| O        | 11.779887  | -1.960561 | -2.081413 | O        | -11.712705 | -2.759685 | -1.231102 |
| O        | 12.311264  | 0.199000  | -0.823079 | O        | -12.249914 | -0.262209 | -1.287787 |
| O        | -12.311273 | 0.199199  | -0.822600 | O        | 12.250005  | -0.262006 | 1.287541  |

|          |            |           |           |   |            |           |           |
|----------|------------|-----------|-----------|---|------------|-----------|-----------|
| O        | -11.779822 | -1.959864 | -2.081757 | O | 11.712800  | -2.759490 | 1.231264  |
| S        | -11.560467 | -1.043074 | -0.968515 | S | 11.532974  | -1.402359 | 0.727453  |
| C        | -11.969222 | -2.038201 | 0.567351  | C | 12.069337  | -1.476882 | -1.067827 |
| F        | 11.969137  | -2.037855 | 0.567729  | F | 13.365607  | -1.757007 | -1.113141 |
| F        | -13.260870 | -2.341548 | 0.546495  | F | 11.849822  | -0.306068 | -1.661846 |
| F        | -11.700465 | -1.326913 | 1.659952  | F | 11.390324  | -2.423654 | -1.711244 |
| C        | -11.252821 | -3.159592 | 0.592944  | C | -0.081804  | 3.441311  | 1.255924  |
| C        | 11.252647  | -3.159181 | 0.593779  | C | -0.166125  | 2.715719  | 2.594761  |
| H        | 11.700434  | -1.326097 | 1.660037  | H | -0.956611  | 4.097129  | 1.139798  |
| H        | 13.260761  | -2.341311 | 0.546996  | H | 0.797880   | 4.100715  | 1.252052  |
| C        | -0.000111  | 3.773255  | 0.321419  | C | -0.244377  | 3.679709  | 3.776149  |
| H        | -0.000326  | 3.808365  | -1.203362 | H | -1.046740  | 2.058453  | 2.606097  |
| C        | 0.879180   | 4.314504  | 0.699258  | C | -0.328546  | 2.963946  | 5.119374  |
| H        | -0.879341  | 4.314432  | 0.699501  | H | 0.635161   | 4.339468  | 3.766135  |
| H        | -0.000486  | 5.232684  | -1.753190 | H | -1.118868  | 4.334888  | 3.653659  |
| H        | 0.879302   | 3.273173  | -1.587292 | H | -0.383721  | 3.676263  | 5.950387  |
| H        | -0.000730  | 5.278828  | -3.276839 | H | -1.216789  | 2.322215  | 5.170525  |
| H        | -0.879291  | 5.770595  | -1.369335 | H | 0.549393   | 2.327070  | 5.283741  |
| C        | 0.878383   | 5.770687  | -1.369610 | C | 0.081814   | 3.441263  | -1.256103 |
| C        | -0.000833  | 6.310454  | -3.646649 | C | 0.166023   | 2.715602  | -2.594915 |
| C        | 0.884114   | 4.777260  | -3.687743 | C | 0.244218   | 3.679513  | -3.776367 |
| C        | -0.885660  | 4.777183  | -3.687461 | C | 0.328286   | 2.963661  | -5.119551 |
| H        | 0.000191   | 2.524139  | 2.507499  | H | -0.635305  | 4.339291  | -3.766339 |
| H        | 0.000413   | 1.228233  | 3.311768  | H | 1.118730   | 4.334682  | -3.653977 |
| H        | 0.000502   | 1.477075  | 4.818149  | H | 0.383412   | 3.675923  | -5.950614 |
| H        | 0.000751   | 0.187496  | 5.630997  | H | 1.216517   | 2.321915  | -5.170721 |
| H        | 0.879238   | 2.080766  | 5.087143  | H | -0.549673  | 2.326785  | -5.283815 |
| H        | -0.878360  | 2.080518  | 5.087286  | H | 0.708898   | 2.062668  | 2.719011  |
| H        | 0.000806   | 0.392303  | 6.707607  | H | 1.046618   | 2.058308  | -2.606266 |
| H        | -0.884072  | -0.421139 | 5.407295  | H | -0.709027  | 2.062565  | -2.719060 |
| H        | 0.885715   | -0.420883 | 5.407156  | H | 0.956660   | 4.097044  | -1.140055 |
| H        | -0.880003  | 3.273076  | -1.587044 | H | -0.797835  | 4.100713  | -1.252217 |
| C        | -0.879179  | 0.625788  | 3.045367  | C | -12.069379 | -1.476730 | 1.067773  |
| F        | 0.880113   | 0.626006  | 3.045228  | F | -11.849916 | -0.305820 | 1.661623  |
| F        | -0.879069  | 3.124585  | 2.781865  | F | -13.365646 | -1.756871 | 1.113058  |
| F        | 0.879387   | 3.124765  | 2.781676  | F | -11.390388 | -2.423391 | 1.711377  |
| H        | -3.136959  | 2.403023  | 0.990537  | H | -3.132995  | 2.581197  | -0.198539 |
| H        | 3.137046   | 2.403403  | 0.989772  | H | 3.133026   | 2.581238  | 0.198259  |
| <b>c</b> |            |           |           |   |            |           |           |
| atom     | x          | y         | z         |   |            |           |           |
| C        | -8.888470  | 1.956333  | 0.584058  |   |            |           |           |
| C        | -7.538165  | 1.659564  | 0.490894  |   |            |           |           |
| C        | -7.102463  | 0.319449  | 0.463073  |   |            |           |           |
| C        | -8.052408  | -0.719321 | 0.534771  |   |            |           |           |
| C        | -9.403902  | -0.428716 | 0.628484  |   |            |           |           |
| C        | -9.808512  | 0.907762  | 0.650093  |   |            |           |           |
| H        | -9.229822  | 2.986422  | 0.617837  |   |            |           |           |
| H        | -6.806949  | 2.460395  | 0.444219  |   |            |           |           |
| H        | -7.717258  | -1.751592 | 0.521760  |   |            |           |           |
| H        | -10.139714 | -1.224135 | 0.696487  |   |            |           |           |

|   |            |           |           |
|---|------------|-----------|-----------|
| C | -5.722045  | 0.019522  | 0.370592  |
| C | -4.533882  | -0.246469 | 0.292495  |
| C | -3.168392  | -0.536334 | 0.202497  |
| C | -1.988596  | 0.763122  | 0.125404  |
| S | -1.162022  | -1.692193 | 0.072181  |
| C | -0.714112  | -0.376596 | 0.051132  |
| C | -0.000034  | -2.664732 | -0.002729 |
| C | 1.161960   | -1.692024 | -0.075268 |
| C | 0.714068   | -0.376478 | -0.050924 |
| C | 1.988564   | 0.763403  | -0.122425 |
| S | 3.168337   | -0.535873 | -0.202846 |
| C | 4.533815   | -0.245792 | -0.292342 |
| C | 5.721959   | 0.020394  | -0.370069 |
| C | 7.102338   | 0.320626  | -0.462122 |
| C | 8.052293   | -0.717891 | -0.537297 |
| C | 9.403742   | -0.426953 | -0.630682 |
| C | 9.808293   | 0.909598  | -0.648443 |
| C | 8.888238   | 1.957931  | -0.578894 |
| C | 9.229536   | 2.988129  | -0.609730 |
| C | 7.537983   | 1.660834  | -0.486097 |
| H | 10.139561  | -1.222133 | -0.701356 |
| C | 7.717187   | -1.750209 | -0.527247 |
| H | 6.806753   | 2.461492  | -0.436741 |
| H | -11.529400 | 1.281403  | 0.766946  |
| H | -11.706497 | 2.638197  | 1.272644  |
| S | -12.244788 | 0.140944  | 1.328904  |
| O | 12.244317  | 0.144850  | -1.330455 |
| O | 11.705968  | 2.641911  | -1.266722 |
| O | 11.529119  | 1.283648  | -0.764895 |
| O | 12.073344  | 1.354937  | 1.028147  |
| S | 13.369591  | 1.635948  | 1.068340  |
| C | 11.857305  | 0.182783  | 1.620769  |
| F | 11.396470  | 2.299914  | 1.676426  |
| F | -0.051952  | -3.584382 | -1.252792 |
| F | 0.078742   | -2.951717 | -2.640252 |
| C | -0.985275  | -4.162983 | -1.201866 |
| C | 0.761604   | -4.313012 | -1.131554 |
| H | -1.130622  | -2.173200 | -3.156324 |
| H | 0.969708   | -2.309300 | -2.674783 |
| C | -0.966407  | -1.760958 | -4.615324 |
| H | -2.032765  | -2.792911 | -3.048640 |
| C | -1.299235  | -1.279208 | -2.545284 |
| H | -1.837631  | -1.201018 | -4.973684 |
| H | -0.083557  | -1.123242 | -4.748544 |
| H | -0.842069  | -2.637027 | -5.264278 |
| H | 0.051901   | -3.587453 | 1.245065  |
| H | -0.078686  | -2.958207 | 2.634092  |
| C | 1.130736   | -2.181009 | 3.152018  |
| C | 0.966646   | -1.772418 | 4.612058  |
| C | 2.032861   | -2.800463 | 3.042709  |
| C | 1.299315   | -1.285492 | 2.543208  |
| H | 1.837907   | -1.213387 | 4.971746  |
| H | 0.083816   | -1.135025 | 4.746947  |
| H | 0.842351   | -2.650106 | 5.258829  |
| H | 0.277363   | -3.772742 | -3.344698 |

|   |            |           |           |
|---|------------|-----------|-----------|
| H | -0.969629  | -2.315851 | 2.670267  |
| H | -0.277286  | -3.780966 | 3.336517  |
| H | 0.985195   | -4.165972 | 1.192667  |
| H | -0.761695  | -4.315745 | 1.122082  |
| H | -12.072898 | 1.357884  | -1.026101 |
| H | -11.856624 | 0.187450  | -1.622029 |
| C | -13.369128 | 1.639018  | -1.066005 |
| F | -11.395755 | 2.304730  | -1.671364 |
| F | -2.558363  | -1.785371 | 0.164919  |
| F | -3.132994  | -2.704980 | 0.200516  |
| H | 2.558291   | -1.784989 | -0.168354 |
| H | 3.132902   | -2.704517 | -0.206323 |
